# Supplementary material for: Trends in Animal Shelter Management, Adoption, and Animal Death in Taiwan from 2012 to 2020
Source: MDPI journal article supplement (doi:10.3390/ani13091451), 2023-04-24
Supplement: s1 [file s1]

**Table S3.** The three-year average number and percentage (the number of the county over the total number in Taiwan) of public animal shelter outcomes for each county in Taiwan from 2012 to 2020.

| <b>County</b>              | <b>2012 - 2014</b> | <b>2015 - 2017</b> | <b>2018 - 2020</b> |
|----------------------------|--------------------|--------------------|--------------------|
| Chiayi County              | 3,276 (3.62%)      | 2,068 (3.49%)      | 231 (0.74%)        |
| Chiayi City                | 1,042 (1.15%)      | 819 (1.38%)        | 285 (0.92%)        |
| Changhua County            | 4,082 (4.51%)      | 2,372 (4.01%)      | 1,173 (3.77%)      |
| Hsinchu County             | 2,749 (3.04%)      | 1,418 (2.40%)      | 414 (1.33%)        |
| Hsinchu City               | 1,237 (1.37%)      | 860 (1.45%)        | 343 (1.10%)        |
| Hualien County             | 2,451 (2.71%)      | 1,061 (1.79%)      | 283 (0.91%)        |
| Kaohsiung                  | 6,107 (6.75%)      | 4,197 (7.09%)      | 4,245 (13.65%)     |
| Keelung County             | 1,536 (1.70%)      | 1,144 (1.93%)      | 423 (1.36%)        |
| Kinmen County              | 833 (0.92%)        | 675 (1.14%)        | 294 (0.95%)        |
| Lienchiang County          | 81 (0.09%)         | 9 (0.02%)          | 18 (0.06%)         |
| Miaoli County              | 2,783 (3.08%)      | 1,631 (2.76%)      | 652 (2.10%)        |
| Nantou County              | 4,793 (5.30%)      | 2,724 (4.60%)      | 340 (1.09%)        |
| New Taipei                 | 10,491 (11.60%)    | 8,794 (14.85%)     | 5,922 (19.04%)     |
| Penghu County              | 603 (0.67%)        | 693 (1.17%)        | 423 (1.36%)        |
| Pingtung County            | 5,454 (6.03%)      | 2,711 (4.58%)      | 390 (1.25%)        |
| Taichung                   | 8,664 (9.58%)      | 4,933 (8.33%)      | 4,445 (14.29%)     |
| Tainan                     | 10,697 (11.83%)    | 8,251 (13.94%)     | 4,184 (13.45%)     |
| Taipei                     | 4,782 (5.29%)      | 3,489 (5.89%)      | 2,450 (7.88%)      |
| Taitung County             | 2,404 (2.66%)      | 1,422 (2.40%)      | 547 (1.76%)        |
| Taoyuan                    | 8,896 (9.84%)      | 5,915 (9.99%)      | 2,553 (8.21%)      |
| Yilan County               | 3,527 (3.90%)      | 1,793 (3.03%)      | 945 (3.04%)        |
| Yunlin County              | 3,971 (4.39%)      | 2,222 (3.75%)      | 538 (1.73%)        |
| Average total <sup>1</sup> | 90,456             | 59,201             | 31,098             |

<sup>1</sup>: the three-year average number of total number of public animal shelter outcomes in Taiwan
