# Supplementary material for: Trends in Animal Shelter Management, Adoption, and Animal Death in Taiwan from 2012 to 2020
Source: MDPI journal article supplement (doi:10.3390/ani13091451), 2023-04-24
Supplement: s1 [file s1]

**Table S2.** The three-year average number and percentage (the number of the county over the total number in Taiwan) of public animal shelter intakes for each county in Taiwan from 2012 to 2020.

| <b>County</b>              | <b>2012 - 2014</b> | <b>2015 - 2017</b> | <b>2018 - 2020</b> |
|----------------------------|--------------------|--------------------|--------------------|
| Chiayi County              | 3,971 (3.74%)      | 2,108 (3.38%)      | 684 (1.53%)        |
| Chiayi City                | 1,137 (1.07%)      | 827 (1.33%)        | 313 (0.70%)        |
| Changhua County            | 5,521 (5.20%)      | 2,377 (3.81%)      | 1,491 (3.32%)      |
| Hsinchu County             | 2,870 (2.70%)      | 1,419 (2.28%)      | 508 (1.13%)        |
| Hsinchu City               | 1,348 (1.27%)      | 878 (1.41%)        | 553 (1.23%)        |
| Hualien County             | 2,941 (2.77%)      | 1,084 (1.74%)      | 513 (1.14%)        |
| Kaohsiung                  | 9,182 (8.64%)      | 5,152 (8.26%)      | 4,707 (10.49%)     |
| Keelung County             | 1,871 (1.76%)      | 1,150 (1.85%)      | 433 (0.96%)        |
| Kinmen County              | 1,244 (1.17%)      | 1,070 (1.72%)      | 884 (1.97%)        |
| Lienchiang County          | 96 (0.09%)         | 18 (0.03%)         | 21 (0.05%)         |
| Miaoli County              | 3,347 (3.15%)      | 1,698 (2.72%)      | 1,466 (3.27%)      |
| Nantou County              | 5,558 (5.23%)      | 2,770 (4.44%)      | 539 (1.20%)        |
| New Taipei                 | 13,564 (12.76%)    | 8,907 (14.29%)     | 6,040 (13.46%)     |
| Penghu County              | 1,098 (1.03%)      | 729 (1.17%)        | 538 (1.20%)        |
| Pingtung County            | 5,477 (5.15%)      | 2,665 (4.28%)      | 731 (1.63%)        |
| Taichung                   | 9,496 (8.94%)      | 5,544 (8.90%)      | 7,656 (17.06%)     |
| Tainan                     | 11,472 (10.80%)    | 8,198 (13.15%)     | 7,595 (16.93%)     |
| Taipei                     | 6,023 (5.67%)      | 3,604 (5.78%)      | 2,757 (6.14%)      |
| Taitung County             | 2,687 (2.53%)      | 1,414 (2.27%)      | 556 (1.24%)        |
| Taoyuan                    | 9,318 (8.77%)      | 6,120 (9.82%)      | 4,794 (10.68%)     |
| Yilan County               | 3,963 (3.73%)      | 2,321 (3.72%)      | 1,508 (3.36%)      |
| Yunlin County              | 4,085 (3.84%)      | 2,270 (3.64%)      | 584 (1.30%)        |
| Average total <sup>1</sup> | 106,270            | 62,322             | 44,873             |

<sup>1</sup>: the three-year average number of total number of public animal shelter intakes in Taiwan
