# Supplementary material for: Trends in Animal Shelter Management, Adoption, and Animal Death in Taiwan from 2012 to 2020
Source: MDPI journal article supplement (doi:10.3390/ani13091451), 2023-04-24
Supplement: s1 [file s1]

**Table S5.** Univariable linear regression results

**Table S5 Table 1.** Univariable linear regression results for the number of shelter animal intakes per month over the maximum shelter capacity from 2012 to 2020.

| Covariate | Category                     | Estimate (95% CI <sup>1</sup> ) | <i>P</i> -value | <i>P</i> -value for the covariate |
|-----------|------------------------------|---------------------------------|-----------------|-----------------------------------|
| Year      | Intercept                    | 146.56 (127.02 to 166.09)       | <0.001          | <0.001                            |
|           | Year                         | -15.70 (-19.81 to -11.60)       | <0.001          |                                   |
| County    | Intercept (Taipei)           | 56.38 (12.71 to 100.05)         | 0.012           | <0.001                            |
|           | Chiayi County                | 114.41 (52.65 to 176.17)        | <0.001          |                                   |
|           | Chiayi City                  | -3.69 (-65.45 to 58.07)         | 0.907           |                                   |
|           | Changhua County              | 47.53 (-14.23 to 109.30)        | 0.133           |                                   |
|           | Hsinchu County               | 49.37 (-12.40 to 111.13)        | 0.119           |                                   |
|           | Hsinchu City                 | -37.07 (-98.83 to 24.70)        | 0.241           |                                   |
|           | Hualien County               | 69.70 (7.94 to 131.46)          | 0.028           |                                   |
|           | Kaohsiung                    | -0.71 (-62.47 to 61.05)         | 0.982           |                                   |
|           | Keelung County               | 7.58 (-54.18 to 69.34)          | 0.810           |                                   |
|           | Kinmen and Lienchiang County | -32.01 (-93.77 to 29.75)        | 0.311           |                                   |
|           | Miaoli County                | 3.90 (-57.86 to 65.66)          | 0.902           |                                   |
|           | Nantou County                | 10.20 (-51.56 to 71.96)         | 0.747           |                                   |
|           | New Taipei                   | -16.68 (-78.44 to 45.08)        | 0.597           |                                   |
|           | Penghu County                | -40.66 (-102.42 to 21.11)       | 0.199           |                                   |
|           | Pingtung County              | 211.52 (149.76 to 273.28)       | <0.001          |                                   |

|                                         |                              |                            |        |        |
|-----------------------------------------|------------------------------|----------------------------|--------|--------|
|                                         | Taichung                     | 69.70 (7.94 to 131.46)     | 0.028  |        |
|                                         | Tainan                       | 43.29 (-18.47 to 105.05)   | 0.171  |        |
|                                         | Taitung County               | 51.43 (-10.33 to 113.20)   | 0.105  |        |
|                                         | Taoyuan                      | 9.74 (-52.02 to 71.51)     | 0.758  |        |
|                                         | Yilan County                 | 9.20 (-52.56 to 70.96)     | 0.771  |        |
|                                         | Yunlin County                | 7.90 (-53.86 to 69.66)     | 0.802  |        |
| Administrative division <sup>2</sup>    | Intercept (County)           | 113.89 (97.66 to 130.13)   | <0.001 | <0.001 |
|                                         | City                         | -68.58 (-102.38 to -34.77) | <0.001 |        |
|                                         | Metropolis                   | -39.96 (-66.48 to -13.44)  | 0.004  |        |
|                                         | Outer island                 | -93.85 (-133.63 to -54.07) | <0.001 |        |
| Geographical division <sup>3</sup>      | Intercept (West)             | 84.22 (61.43 to 107.02)    | <0.001 | <0.001 |
|                                         | East                         | 32.72 (-9.92 to 75.36)     | 0.134  |        |
|                                         | North                        | -24.68 (-54.52 to 5.16)    | 0.107  |        |
|                                         | Outer island                 | -64.18 (-106.82 to -21.54) | 0.004  |        |
|                                         | South                        | 45.12 (12.89 to 77.35)     | 0.007  |        |
| Per capita gross domestic product (GDP) | Intercept                    | 545.72 (423.40 to 668.04)  | <0.001 | <0.001 |
|                                         | Every 1000 New Taiwan Dollar | -0.63 (-0.79 to -0.46)     | <0.001 |        |
| Population                              | Intercept                    | 86.51 (69.21 to 103.81)    | <0.001 | 0.662  |
|                                         | Every 100,000 people         | -0.25 (-1.35 to 0.86)      | 0.662  |        |
| Higher education <sup>4</sup>           | Intercept                    | 172.33 (132.46 to 212.20)  | <0.001 | <0.001 |
|                                         | %                            | -2.31 (-3.30 to -1.31)     | <0.001 |        |
| Plain area of a county                  | Intercept                    | 49.51 (31.91 to 67.11)     | <0.001 | <0.001 |

|                                         |                                    |                            |        |        |
|-----------------------------------------|------------------------------------|----------------------------|--------|--------|
|                                         | 10 km <sup>2</sup>                 | 0.74 (0.45 to 1.03)        | <0.001 |        |
| Population density over the plain area  | Intercept                          | 90.60 (76.88 to 104.33)    | <0.001 | 0.048  |
|                                         | 100,000 people / 1 km <sup>2</sup> | -1.14 (-2.25E to -0.02)    | 0.048  |        |
| Population density over the county area | Intercept                          | 96.23 (81.73 to 110.72)    | <0.001 | 0.004  |
|                                         | Person / 1 km <sup>2</sup>         | -0.01 (-0.01 to -2.59E-03) | 0.004  |        |
| Fertility rate                          | Intercept                          | 144.94 (81.29 to 208.60)   | <0.001 | 0.057  |
|                                         | %                                  | -1.90 (-3.84 to 0.04)      | 0.057  |        |
| Euthanasia <sup>5</sup>                 | Intercept (No)                     | 40.55 (24.44 to 56.66)     | <0.001 | <0.001 |
|                                         | Yes                                | 77.75 (56.14 to 99.36)     | <0.001 |        |

<sup>1</sup>: confidence interval

<sup>2</sup>: administrative divisions in Taiwan (i.e., metropolis, city, county, and outer island)

<sup>3</sup>: geographical divisions (i.e., north, south, west, east, and outer island)

<sup>4</sup>: percentage of people above 15 years old with a bachelor's degree by county and month

<sup>5</sup>: whether euthanasia for population control was enforced

**Table S5 Table 2.** Univariable linear regression results for the number of shelter animal outcomes per month over the maximum shelter capacity from 2012 to 2020.

| Covariate | Category                     | Estimate (95% CI <sup>1</sup> ) | P-value | P-value for the covariate |
|-----------|------------------------------|---------------------------------|---------|---------------------------|
| Year      | Intercept                    | 133.32 (114.43 to 152.21)       | <0.001  | <0.001                    |
|           | Year                         | -15.12 (-19.09 to -11.15)       | <0.001  |                           |
| County    | Intercept (Taipei)           | 48.84 (5.83 to 91.86)           | 0.027   | <0.001                    |
|           | Chiayi County                | 91.92 (31.08 to 152.76)         | 0.004   |                           |
|           | Chiayi City                  | 0.82 (-60.02 to 61.66)          | 0.979   |                           |
|           | Changhua County              | 35.56 (-25.28 to 96.39)         | 0.254   |                           |
|           | Hsinchu County               | 52.14 (-8.69 to 112.98)         | 0.095   |                           |
|           | Hsinchu City                 | -31.90 (-92.74 to 28.94)        | 0.306   |                           |
|           | Hualien County               | 56.57 (-4.27 to 117.40)         | 0.070   |                           |
|           | Kaohsiung                    | -6.30 (-67.14 to 54.54)         | 0.839   |                           |
|           | Keelung County               | 8.62 (-52.22 to 69.46)          | 0.782   |                           |
|           | Kinmen and Lienchiang County | -34.89 (-95.72 to 25.95)        | 0.263   |                           |
|           | Miaoli County                | -1.92 (-62.76 to 58.92)         | 0.951   |                           |
|           | Nantou County                | 10.16 (-50.68 to 70.99)         | 0.744   |                           |
|           | New Taipei                   | -13.73 (-74.57 to 47.10)        | 0.659   |                           |
|           | Penghu County                | -37.41 (-98.25 to 23.43)        | 0.230   |                           |
|           | Pingtung County              | 209.47 (148.63 to 270.30)       | <0.001  |                           |
|           | Taichung                     | 51.39 (-9.45 to 112.23)         | 0.100   |                           |
|           | Tainan                       | 35.69 (-25.15 to 96.53)         | 0.252   |                           |

|                                         |                       |                                    |        |        |
|-----------------------------------------|-----------------------|------------------------------------|--------|--------|
|                                         | Taitung County        | 52.38 (-8.46 to 113.22)            | 0.093  |        |
|                                         | Taoyuan               | 7.90 (-52.94 to 68.74)             | 0.799  |        |
|                                         | Yilan County          | 3.89 (-56.95 to 64.73)             | 0.900  |        |
|                                         | Yunlin County         | 13.48 (-47.36 to 74.32)            | 0.665  |        |
| Administrative division <sup>2</sup>    | Intercept (County)    | 101.21 (85.40 to 117.01)           | <0.001 | <0.001 |
|                                         | City                  | -59.85 (-92.74 to -26.95)          | <0.001 |        |
|                                         | Metropolis            | -39.87 (-65.68 to -14.07)          | 0.003  |        |
|                                         | Outer island          | -88.51 (-127.22 to -49.80)         | <0.001 |        |
| Geographical division <sup>3</sup>      | Intercept (West)      | 70.58 (48.34 to 92.81)             | <0.001 | <0.001 |
|                                         | East                  | 32.74 (-8.86 to 74.34)             | 0.125  |        |
|                                         | North                 | -17.89 (-47.00 to 11.23)           | 0.230  |        |
|                                         | Outer island          | -57.88 (-99.48 to -16.28)          | 0.007  |        |
|                                         | South                 | 44.59 (13.14 to 76.03)             | 0.006  |        |
| Per capita gross domestic product (GDP) | Intercept             | 508.30 (389.26 to 627.34)          | <0.001 | <0.001 |
|                                         | New Taiwan Dollar     | -5.91E-04 (-7.51E-04 to -4.30E-04) | <0.001 |        |
| Population                              | Intercept             | 76.68 (59.97 to 93.39)             | <0.001 | 0.530  |
|                                         | Number of people      | -3.43E-06 (-1.41E-05 to 7.26E-06)  | 0.530  |        |
| Higher education <sup>4</sup>           | Intercept             | 154.29 (115.56 to 193.01)          | <0.001 | <0.001 |
|                                         | %                     | -2.12 (-3.09 to -1.16)             | <0.001 |        |
| Plain area of a county                  | Intercept             | 42.47 (25.29 to 59.66)             | <0.001 | <0.001 |
|                                         | 10,000 m <sup>2</sup> | 6.57E-04 (3.73E-04 to 9.41E-04)    | <0.001 |        |
| Population density over the plain area  | Intercept             | 78.65 (65.36 to 91.95)             | <0.001 | 0.082  |

|                                         |                                |                                    |        |        |
|-----------------------------------------|--------------------------------|------------------------------------|--------|--------|
|                                         | Person / 10,000 m <sup>2</sup> | -9.63E-04 (-2.04E-03 to 1.18E-04)  | 0.082  |        |
| Population density over the county area | Intercept                      | 83.75 (69.69 to 97.82)             | <0.001 | 0.009  |
|                                         | Person / 1 km <sup>2</sup>     | -6.91E-03 (-1.21E-02 to -1.75E-03) | 0.009  |        |
| Fertility rate                          | Intercept                      | 124.88 (63.23 to 186.53)           | <0.001 | 0.094  |
|                                         | %                              | -1.61 (-3.49 to 0.26)              | 0.094  |        |
| Euthanasia <sup>5</sup>                 | Intercept (No)                 | 29.49 (14.09 to 44.89)             | <0.001 | <0.001 |
|                                         | Yes                            | 78.02 (57.35 to 98.68)             | <0.001 |        |

<sup>1</sup>: confidence interval

<sup>2</sup>: administrative divisions in Taiwan (i.e., metropolis, city, county, and outer island)

<sup>3</sup>: geographical divisions (i.e., north, south, west, east, and outer island)

<sup>4</sup>: percentage of people above 15 years old with a bachelor's degree by county and month

<sup>5</sup>: whether euthanasia for population control was enforced

**Table S5 Table 3.** Univariable linear regression results for the number of adopted animals over the shelter animal intakes per month from 2012 to 2020.

| Covariate | Category                     | Estimate (95% CI <sup>1</sup> ) | <i>P</i> -value | P-value for the covariate |
|-----------|------------------------------|---------------------------------|-----------------|---------------------------|
| Year      | Intercept                    | 41.28 (34.92 to 47.64)          | <0.001          | <0.001                    |
|           | Year                         | 4.13 (2.80 to 5.47)             | <0.001          |                           |
| County    | Intercept (Taipei)           | 80.35 (65.70 to 94.99)          | <0.001          | <0.001                    |
|           | Chiayi County                | -26.34 (-47.05 to -5.62)        | 0.014           |                           |
|           | Chiayi City                  | 2.94 (-17.78 to 23.65)          | 0.782           |                           |
|           | Changhua County              | -30.34 (-51.06 to -9.63)        | 0.005           |                           |
|           | Hsinchu County               | -13.50 (-34.21 to 7.22)         | 0.203           |                           |
|           | Hsinchu City                 | -18.31 (-39.03 to 2.41)         | 0.085           |                           |
|           | Hualien County               | -26.87 (-47.58 to -6.15)        | 0.012           |                           |
|           | Kaohsiung                    | -13.93 (-34.65 to 6.78)         | 0.189           |                           |
|           | Keelung County               | -17.73 (-38.44 to 2.99)         | 0.095           |                           |
|           | Kinmen and Lienchiang County | -56.52 (-77.24 to -35.81)       | <0.001          |                           |
|           | Miaoli County                | -40.51 (-61.22 to -19.79)       | <0.001          |                           |
|           | Nantou County                | -39.82 (-60.54 to -19.11)       | <0.001          |                           |
|           | New Taipei                   | -1.52 (-22.23 to 19.20)         | 0.886           |                           |
|           | Penghu County                | -37.46 (-58.17 to -16.74)       | <0.001          |                           |
|           | Pingtung County              | -41.84 (-62.56 to -21.13)       | <0.001          |                           |
|           | Taichung                     | -25.22 (-45.94 to -4.51)        | 0.018           |                           |
|           | Tainan                       | -13.55 (-34.26 to 7.17)         | 0.202           |                           |

|                                         |                       |                                   |        |        |
|-----------------------------------------|-----------------------|-----------------------------------|--------|--------|
|                                         | Taitung County        | -1.82 (-22.53 to 18.90)           | 0.864  |        |
|                                         | Taoyuan               | -15.40 (-36.12 to 5.31)           | 0.147  |        |
|                                         | Yilan County          | -39.80 (-60.52 to -19.09)         | <0.001 |        |
|                                         | Yunlin County         | -15.66 (-36.37 to 5.06)           | 0.140  |        |
| Administrative division <sup>2</sup>    | Intercept (County)    | 52.70 (47.71 to 57.69)            | <0.001 | <0.001 |
|                                         | City                  | 16.62 (6.23 to 27.00)             | 0.002  |        |
|                                         | Metropolis            | 16.05 (7.90 to 24.19)             | <0.001 |        |
|                                         | Outer island          | -19.34 (-31.56 to -7.12)          | 0.002  |        |
| Geographical division <sup>3</sup>      | Intercept (West)      | 50.04 (42.82 to 57.25)            | <0.001 | <0.001 |
|                                         | East                  | 15.97 (2.47 to 29.47)             | 0.022  |        |
|                                         | North                 | 15.13 (5.68 to 24.58)             | 0.002  |        |
|                                         | Outer island          | -16.68 (-30.18 to -3.18)          | 0.016  |        |
|                                         | South                 | 11.77 (1.56 to 21.97)             | 0.025  |        |
| Per capita gross domestic product (GDP) | Intercept             | -73.58 (-112.74 to -34.42)        | <0.001 | <0.001 |
|                                         | New Taiwan Dollar     | 1.78E-04 (1.25E-04 to 2.31E-04)   | <0.001 |        |
| Population                              | Intercept             | 50.89 (45.66 to 56.11)            | <0.001 | <0.001 |
|                                         | Number of people      | 6.19E-06 (2.85E-06 to 9.54E-06)   | <0.001 |        |
| Higher education <sup>4</sup>           | Intercept             | 21.51 (9.57 to 33.46)             | <0.001 | <0.001 |
|                                         | %                     | 0.95 (0.65 to 1.24)               | <0.001 |        |
| Plain area of a county                  | Intercept             | 58.84 (52.99 to 64.69)            | <0.001 | 0.652  |
|                                         | 10,000 m <sup>2</sup> | -2.23E-05 (-1.19E-04 to 7.44E-05) | 0.652  |        |
| Population density over the plain area  | Intercept             | 54.99 (50.74 to 59.24)            | <0.001 | 0.009  |



|                                         |                                |                                 |        |        |
|-----------------------------------------|--------------------------------|---------------------------------|--------|--------|
|                                         | Person / 10,000 m <sup>2</sup> | 4.67E-04 (1.21E-04 to 8.13E-04) | 0.009  |        |
| Population density over the county area | Intercept                      | 52.11 (47.70 to 56.52)          | <0.001 | <0.001 |
|                                         | Person / 1 km <sup>2</sup>     | 3.61E-03 (2.00E-03 to 5.23E-03) | <0.001 |        |
| Fertility rate                          | Intercept                      | 76.51 (56.62 to 96.40)          | <0.001 | 0.062  |
|                                         | %                              | -0.58 (-1.19 to 0.03)           | 0.062  |        |
| Euthanasia <sup>5</sup>                 | Intercept (No)                 | 67.53 (62.19 to 72.87)          | <0.001 | <0.001 |
|                                         | Yes                            | -17.49 (-24.66 to -10.32)       | <0.001 |        |

<sup>1</sup>: confidence interval

<sup>2</sup>: administrative divisions in Taiwan (i.e., metropolis, city, county, and outer island)

<sup>3</sup>: geographical divisions (i.e., north, south, west, east, and outer island)

<sup>4</sup>: percentage of people above 15 years old with a bachelor's degree by county and month

<sup>5</sup>: whether euthanasia for population control was enforced

**Table S5 Table 4.** Univariable linear regression results for the number of unassisted death animals over the shelter animal intakes per year from 2012 to 2020.

| <b>Covariate</b> | <b>Category</b>              | <b>Estimate (95% CI<sup>1</sup>)</b> | <b>P-value</b> | <b>P-value for the covariate</b> |
|------------------|------------------------------|--------------------------------------|----------------|----------------------------------|
| Year             | Intercept                    | 11.83 (9.39 to 14.27)                | <0.001         | 0.072                            |
|                  | Year                         | -0.63 (-1.30 to 0.05)                | 0.072          |                                  |
| County           | Intercept (Taipei)           | 7.02 (1.76 to 12.28)                 | 0.010          | <0.001                           |
|                  | Chiayi County                | 10.38 (2.95 to 17.82)                | 0.007          |                                  |
|                  | Chiayi City                  | -2.44 (-9.88 to 5.00)                | 0.521          |                                  |
|                  | Changhua County              | 6.63 (-0.81 to 14.06)                | 0.083          |                                  |
|                  | Hsinchu County               | -0.16 (-7.59 to 7.28)                | 0.967          |                                  |
|                  | Hsinchu City                 | 4.29 (-3.15 to 11.72)                | 0.261          |                                  |
|                  | Hualien County               | -0.98 (-8.41 to 6.46)                | 0.797          |                                  |
|                  | Kaohsiung                    | 6.69 (-0.75 to 14.13)                | 0.080          |                                  |
|                  | Keelung County               | 3.15 (-4.29 to 10.58)                | 0.409          |                                  |
|                  | Kinmen and Lienchiang County | -1.52 (-8.96 to 5.92)                | 0.689          |                                  |
|                  | Miaoli County                | 11.45 (4.01 to 18.88)                | 0.003          |                                  |
|                  | Nantou County                | 7.54 (0.10 to 14.98)                 | 0.049          |                                  |
|                  | New Taipei                   | 1.02 (-6.42 to 8.46)                 | 0.789          |                                  |
|                  | Penghu County                | 16.12 (8.68 to 23.56)                | <0.001         |                                  |
|                  | Pingtung County              | -3.50 (-10.93 to 3.94)               | 0.358          |                                  |
|                  | Taichung                     | 0.04 (-7.40 to 7.47)                 | 0.992          |                                  |
|                  | Tainan                       | -0.14 (-7.57 to 7.30)                | 0.971          |                                  |

|                                      |                    |                         |        |       |
|--------------------------------------|--------------------|-------------------------|--------|-------|
|                                      | Taitung County     | -4.14 (-11.58 to 3.30)  | 0.277  |       |
|                                      | Taoyuan            | -2.41 (-9.85 to 5.02)   | 0.526  |       |
|                                      | Yilan County       | 4.11 (-3.33 to 11.55)   | 0.281  |       |
|                                      | Yunlin County      | 5.40 (-2.03 to 12.84)   | 0.157  |       |
| Administrative division <sup>2</sup> | Intercept (County) | 10.70 (8.75 to 12.65)   | <0.001 | 0.062 |
|                                      | City               | -2.01 (-6.07 to 2.05)   | 0.334  |       |
|                                      | Metropolis         | -2.81 (-5.99 to 0.38)   | 0.086  |       |
|                                      | Outer island       | 3.63 (-1.15 to 8.40)    | 0.139  |       |
| Geographical division <sup>3</sup>   | Intercept (West)   | 13.23 (10.56 to 15.91)  | <0.001 | 0.002 |
|                                      | East               | -8.77 (-13.77 to -3.77) | <0.001 |       |
|                                      | North              | -4.78 (-8.28 to -1.28)  | 0.008  |       |
|                                      | Outer island       | 1.09 (-3.91 to 6.09)    | 0.670  |       |
|                                      | South              | -4.01 (-7.79 to -0.23)  | 0.039  |       |
| Higher education <sup>4</sup>        | Intercept          | 14.82 (10.02 to 19.61)  | <0.001 | 0.040 |
|                                      | %                  | -0.12 (-0.24 to -0.01)  | 0.040  |       |
| Euthanasia <sup>5</sup>              | Intercept (No)     | 8.86 (7.07 to 10.65)    | <0.001 | 0.071 |
|                                      | Yes                | 2.55 (-0.19 to 5.29)    | 0.071  |       |

<sup>1</sup>: confidence interval

<sup>2</sup>: administrative divisions in Taiwan (i.e., metropolis, city, county, and outer island)

<sup>3</sup>: geographical divisions (i.e., north, south, west, east, and outer island)

<sup>4</sup>: percentage of people above 15 years old with a bachelor's degree by county and month

<sup>5</sup>: whether euthanasia for population control was enforced

**Table S5 Table 5.** Univariable linear regression results for the shelter animal intakes per month over the maximum shelter capacity from 2018 to 2020.

| <b>Covariate</b> | <b>Category</b>              | <b>Estimate (95% CI<sup>1</sup>)</b> | <b>P-value</b> | <b>P-value for the covariate</b> |
|------------------|------------------------------|--------------------------------------|----------------|----------------------------------|
| Year             | Intercept                    | 32.98 (29.19 to 36.78)               | <0.001         | <0.001                           |
|                  | Year                         | 7.09 (4.15 to 10.03)                 | <0.001         |                                  |
| Month            | Intercept                    | 33.77 (28.60 to 38.93)               | <0.001         | 0.007                            |
|                  | Month                        | 0.97 (0.27 to 1.67)                  | 0.007          |                                  |
| County           | Intercept (Taipei)           | 39.05 (31.95 to 46.16)               | <0.001         | <0.001                           |
|                  | Chiayi County                | 12.79 (2.75 to 22.84)                | 0.013          |                                  |
|                  | Chiayi City                  | -17.33 (-27.38 to -7.28)             | <0.001         |                                  |
|                  | Changhua County              | 10.45 (0.40 to 20.50)                | 0.042          |                                  |
|                  | Hsinchu County               | -5.37 (-15.42 to 4.68)               | 0.295          |                                  |
|                  | Hsinchu City                 | -27.50 (-37.55 to -17.45)            | <0.001         |                                  |
|                  | Hualien County               | 3.73 (-6.32 to 13.77)                | 0.468          |                                  |
|                  | Kaohsiung                    | 2.25 (-7.80 to 12.30)                | 0.660          |                                  |
|                  | Keelung County               | -15.00 (-25.05 to -4.95)             | 0.004          |                                  |
|                  | Kinmen and Lienchiang County | -19.19 (-29.24 to -9.14)             | <0.001         |                                  |
|                  | Miaoli County                | 1.93 (-8.12 to 11.98)                | 0.707          |                                  |
|                  | Nantou County                | -26.92 (-36.97 to -16.87)            | <0.001         |                                  |
|                  | New Taipei                   | -13.81 (-23.85 to -3.76)             | 0.007          |                                  |
|                  | Penghu County                | -28.31 (-38.36 to -18.26)            | <0.001         |                                  |
|                  | Pingtung County              | 27.16 (17.12 to 37.21)               | <0.001         |                                  |

|                                         |                    |                                 |        |        |
|-----------------------------------------|--------------------|---------------------------------|--------|--------|
|                                         | Taichung           | 88.55 (78.50 to 98.60)          | <0.001 |        |
|                                         | Tainan             | 44.24 (34.19 to 54.29)          | <0.001 |        |
|                                         | Taitung County     | -0.46 (-10.51 to 9.58)          | 0.928  |        |
|                                         | Taoyuan            | 7.94 (-2.10 to 17.99)           | 0.122  |        |
|                                         | Yilan County       | -0.97 (-11.02 to 9.07)          | 0.849  |        |
|                                         | Yunlin County      | -22.82 (-32.87 to -12.77)       | <0.001 |        |
| Administrative division <sup>2</sup>    | Intercept (County) | 39.00 (35.86 to 42.15)          | <0.001 | <0.001 |
|                                         | City               | -19.90 (-26.44 to -13.35)       | <0.001 |        |
|                                         | Metropolis         | 21.58 (16.44 to 26.72)          | <0.001 |        |
|                                         | Outer island       | -23.70 (-31.41 to -16.00)       | <0.001 |        |
| Geographical division <sup>3</sup>      | Intercept (West)   | 49.29 (44.61 to 53.97)          | <0.001 | <0.001 |
|                                         | East               | -8.61 (-17.37 to 0.15)          | 0.054  |        |
|                                         | North              | -18.05 (-24.18 to -11.92)       | <0.001 |        |
|                                         | Outer island       | -33.99 (-42.75 to -25.23)       | <0.001 |        |
|                                         | South              | 3.59 (-3.04 to 10.21)           | 0.289  |        |
| Per capita gross domestic product (GDP) | Intercept          | -146.60 (-226.56 to -66.64)     | <0.001 | <0.001 |
|                                         | New Taiwan Dollar  | 2.31E-04 (1.32E-04 to 3.31E-04) | <0.001 |        |
| Population                              | Intercept          | 28.57 (25.28 to 31.86)          | <0.001 | <0.001 |
|                                         | Number of people   | 1.02E-05 (8.15E-06 to 1.23E-05) | <0.001 |        |
| Higher education                        | Intercept          | 37.72 (28.26 to 47.19)          | <0.001 | 0.615  |
|                                         | %                  | 0.06 (-0.16 to 0.28)            | 0.615  |        |
| Plain area of a county                  | Intercept          | 23.68 (20.29 to 27.07)          | <0.001 | <0.001 |

|                                         |                                   |                                    |        |        |
|-----------------------------------------|-----------------------------------|------------------------------------|--------|--------|
|                                         | 10,000 m <sup>2</sup>             | 3.62E-04 (3.06E-04 to 4.19E-04)    | <0.001 |        |
| Population density over the plain area  | Intercept                         | 42.69 (39.90 to 45.49)             | <0.001 | <0.001 |
|                                         | Person / 10,000 m <sup>2</sup>    | -4.25E-04 (-6.54E-04 to -1.96E-04) | <0.001 |        |
| Population density over the county area | Intercept                         | 42.60 (39.62 to 45.58)             | <0.001 | 0.004  |
|                                         | Person / 1 km <sup>2</sup>        | -1.60E-03 (-2.70E-03 to -5.01E-04) | 0.004  |        |
| Fertility rate                          | Intercept                         | 60.41 (45.30 to 75.52)             | <0.001 | 0.008  |
|                                         | ‰                                 | -0.70 (-1.20 to -0.19)             | 0.008  |        |
| Stray dogs                              | Intercept                         | 21.01 (17.27 to 24.74)             | <0.001 | <0.001 |
|                                         | Number of stray dogs              | 2.73E-03 (2.30E-03 to 3.16E-03)    | <0.001 |        |
| Total pets                              | Intercept                         | 27.61 (24.03 to 31.18)             | <0.001 | <0.001 |
|                                         | Number of pet dogs and pet cats   | 1.14E-04 (8.89E-05 to 1.39E-04)    | <0.001 |        |
| Total managers                          | Intercept                         | 35.47 (32.44 to 38.49)             | <0.001 | <0.001 |
|                                         | Number of managers                | 0.35 (0.21 to 0.49)                | <0.001 |        |
| Total ACOs                              | Intercept                         | 27.02 (22.99 to 31.06)             | <0.001 | <0.001 |
|                                         | Number of animal control officers | 2.25 (1.68 to 2.81)                | <0.001 |        |
| Total vets                              | Intercept                         | 26.68 (23.61 to 29.75)             | <0.001 | <0.001 |
|                                         | Number of veterinarians           | 2.57 (2.17 to 2.98)                | <0.001 |        |
| Working day                             | Intercept                         | 4.14 (-20.07 to 28.36)             | 0.738  | 0.004  |
|                                         | Number of working days monthly    | 1.72 (0.57 to 2.88)                | 0.004  |        |

<sup>1</sup>: confidence interval

<sup>2</sup>: administrative divisions in Taiwan (i.e., metropolis, city, county, and outer island)

<sup>3</sup>: geographical divisions (i.e., north, south, west, east, and outer island)

**Table S5 Table 6.** Univariable linear regression results for the shelter animal outcomes per month over the maximum shelter capacity from 2018 to 2020.

| Covariate | Category                     | Estimate (95% CI <sup>1</sup> ) | <i>P</i> -value | P-value for the covariate |
|-----------|------------------------------|---------------------------------|-----------------|---------------------------|
| Year      | Intercept                    | 31.37 (27.51 to 35.23)          | <0.001          | <0.001                    |
|           | Year                         | 8.01 (5.03 to 11.00)            | <0.001          |                           |
| Month     | Intercept                    | 33.08 (27.80 to 38.35)          | <0.001          | 0.008                     |
|           | Month                        | 0.97 (0.25 to 1.69)             | 0.008           |                           |
| County    | Intercept (Taipei)           | 36.97 (29.51 to 44.42)          | <0.001          | <0.001                    |
|           | Chiayi County                | 16.24 (5.70 to 26.79)           | 0.003           |                           |
|           | Chiayi City                  | -15.60 (-26.14 to -5.05)        | 0.004           |                           |
|           | Changhua County              | 11.89 (1.35 to 22.44)           | 0.027           |                           |
|           | Hsinchu County               | -5.46 (-16.01 to 5.08)          | 0.310           |                           |
|           | Hsinchu City                 | -25.98 (-36.52 to -15.43)       | <0.001          |                           |
|           | Hualien County               | 7.03 (-3.51 to 17.57)           | 0.192           |                           |
|           | Kaohsiung                    | 2.96 (-7.59 to 13.50)           | 0.583           |                           |
|           | Keelung County               | -12.12 (-22.66 to -1.58)        | 0.025           |                           |
|           | Kinmen and Lienchiang County | -17.50 (-28.05 to -6.96)        | 0.001           |                           |
|           | Miaoli County                | 3.17 (-7.37 to 13.71)           | 0.556           |                           |
|           | Nantou County                | -24.53 (-35.07 to -13.98)       | <0.001          |                           |
|           | New Taipei                   | -11.90 (-22.44 to -1.36)        | 0.027           |                           |
|           | Penghu County                | -27.96 (-38.50 to -17.41)       | <0.001          |                           |
|           | Pingtung County              | 27.34 (16.80 to 37.89)          | <0.001          |                           |

|                                         |                    |                                 |        |        |
|-----------------------------------------|--------------------|---------------------------------|--------|--------|
|                                         | Taichung           | 91.08 (80.53 to 101.62)         | <0.001 |        |
|                                         | Tainan             | 44.18 (33.63 to 54.72)          | <0.001 |        |
|                                         | Taitung County     | 1.27 (-9.27 to 11.81)           | 0.814  |        |
|                                         | Taoyuan            | 8.80 (-1.75 to 19.34)           | 0.102  |        |
|                                         | Yilan County       | -0.29 (-10.83 to 10.25)         | 0.957  |        |
|                                         | Yunlin County      | -21.80 (-32.34 to -11.26)       | <0.001 |        |
| Administrative division <sup>2</sup>    | Intercept (County) | 38.46 (35.22 to 41.69)          | <0.001 | <0.001 |
|                                         | City               | -19.38 (-26.13 to -12.64)       | <0.001 |        |
|                                         | Metropolis         | 21.03 (15.74 to 26.32)          | <0.001 |        |
|                                         | Outer island       | -24.22 (-32.15 to -16.29)       | <0.001 |        |
| Geographical division <sup>3</sup>      | Intercept (West)   | 48.93 (44.15 to 53.71)          | <0.001 | <0.001 |
|                                         | East               | -7.81 (-16.76 to 1.14)          | 0.087  |        |
|                                         | North              | -18.67 (-24.93 to -12.41)       | <0.001 |        |
|                                         | Outer island       | -34.69 (-43.64 to -25.75)       | <0.001 |        |
|                                         | South              | 3.06 (-3.70 to 9.83)            | 0.375  |        |
| Per capita gross domestic product (GDP) | Intercept          | -174.07 (-255.37 to -92.76)     | <0.001 | <0.001 |
|                                         | New Taiwan Dollar  | 2.65E-04 (1.64E-04 to 3.65E-04) | <0.001 |        |
| Population                              | Intercept          | 28.07 (24.70 to 31.44)          | <0.001 | <0.001 |
|                                         | Number of people   | 1.01E-05 (7.93E-06 to 1.22E-05) | <0.001 |        |
| Higher education                        | Intercept          | 37.92 (28.26 to 47.58)          | <0.001 | 0.757  |
|                                         | %                  | 0.04 (-0.19 to 0.26)            | 0.757  |        |
| Plain area of a county                  | Intercept          | 23.27 (19.78 to 26.75)          | <0.001 | <0.001 |



|                                         |                                   |                                    |        |        |
|-----------------------------------------|-----------------------------------|------------------------------------|--------|--------|
|                                         | 10,000 m <sup>2</sup>             | 3.56E-04 (2.98E-04 to 4.15E-04)    | <0.001 |        |
| Population density over the plain area  | Intercept                         | 41.89 (39.04 to 44.75)             | <0.001 | <0.001 |
|                                         | Person / 10,000 m <sup>2</sup>    | -4.06E-04 (-6.40E-04 to -1.72E-04) | <0.001 |        |
| Population density over the county area | Intercept                         | 42.06 (39.02 to 45.11)             | <0.001 | 0.003  |
|                                         | Person / 1 km <sup>2</sup>        | -1.69E-03 (-2.81E-03 to -5.70E-04) | 0.003  |        |
| Fertility rate                          | Intercept                         | 61.60 (46.19 to 77.01)             | <0.001 | 0.004  |
|                                         | ‰                                 | -0.76 (-1.28 to -0.24)             | 0.004  |        |
| Stray dogs                              | Intercept                         | 20.51 (16.67 to 24.34)             | <0.001 | <0.001 |
|                                         | Number of stray dogs              | 2.70E-03 (2.26E-03 to 3.14E-03)    | <0.001 |        |
| Total pets                              | Intercept                         | 27.21 (23.54 to 30.87)             | <0.001 | <0.001 |
|                                         | Number of pet dogs and pet cats   | 1.11E-04 (8.57E-05 to 1.37E-04)    | <0.001 |        |
| Total managers                          | Intercept                         | 34.81 (31.72 to 37.90)             | <0.001 | <0.001 |
|                                         | Number of managers                | 0.35 (0.21 to 0.49)                | <0.001 |        |
| Total ACOs                              | Intercept                         | 26.07 (21.95 to 30.19)             | <0.001 | <0.001 |
|                                         | Number of animal control officers | 2.29 (1.72 to 2.87)                | <0.001 |        |
| Total vets                              | Intercept                         | 26.27 (23.11 to 29.43)             | <0.001 | <0.001 |
|                                         | Number of veterinarians           | 2.52 (2.10 to 2.94)                | <0.001 |        |
| Working day                             | Intercept                         | 6.04 (-18.70 to 30.77)             | 0.633  | 0.008  |
|                                         | Number of working days monthly    | 1.60 (0.42 to 2.78)                | 0.008  |        |

<sup>1</sup>: confidence interval

<sup>2</sup>: administrative divisions in Taiwan (i.e., metropolis, city, county, and outer island)

<sup>3</sup>: geographical divisions (i.e., north, south, west, east, and outer island)

**Table S5 Table 7.** Univariable linear regression results for the number of adopted animals over the number of animals entering and staying at shelters per month from 2018 to 2020.

| Covariate | Category                     | Estimate (95% CI <sup>1</sup> ) | P-value | P-value for the covariate |
|-----------|------------------------------|---------------------------------|---------|---------------------------|
| Year      | Intercept                    | 21.46 (19.96 to 22.96)          | <0.001  | <0.001                    |
|           | Year                         | -2.64 (-3.79 to -1.48)          | <0.001  |                           |
| Month     | Intercept                    | 19.93 (17.89 to 21.97)          | <0.001  | 0.229                     |
|           | Month                        | -0.17 (-0.45 to 0.11)           | 0.229   |                           |
| County    | Intercept (Taipei)           | 13.35 (10.82 to 15.88)          | <0.001  | <0.001                    |
|           | Chiayi County                | -8.63 (-12.21 to -5.05)         | <0.001  |                           |
|           | Chiayi City                  | 10.77 (7.20 to 14.35)           | <0.001  |                           |
|           | Changhua County              | 12.78 (9.20 to 16.35)           | <0.001  |                           |
|           | Hsinchu County               | 10.28 (6.70 to 13.85)           | <0.001  |                           |
|           | Hsinchu City                 | -1.54 (-5.12 to 2.04)           | 0.399   |                           |
|           | Hualien County               | 3.41 (-0.16 to 6.99)            | 0.062   |                           |
|           | Kaohsiung                    | 8.48 (4.90 to 12.05)            | <0.001  |                           |
|           | Keelung County               | 9.45 (5.87 to 13.02)            | <0.001  |                           |
|           | Kinmen and Lienchiang County | -3.73 (-7.31 to -0.16)          | 0.041   |                           |
|           | Miaoli County                | 0.08 (-3.50 to 3.66)            | 0.965   |                           |
|           | Nantou County                | -7.19 (-10.76 to -3.61)         | <0.001  |                           |
|           | New Taipei                   | 8.09 (4.52 to 11.67)            | <0.001  |                           |
|           | Penghu County                | -7.15 (-10.73 to -3.58)         | <0.001  |                           |
|           | Pingtung County              | 13.63 (10.05 to 17.20)          | <0.001  |                           |

|                                         |                    |                                    |        |        |
|-----------------------------------------|--------------------|------------------------------------|--------|--------|
|                                         | Taichung           | 13.04 (9.47 to 16.62)              | <0.001 |        |
|                                         | Tainan             | 8.07 (4.50 to 11.65)               | <0.001 |        |
|                                         | Taitung County     | 43.39 (39.82 to 46.97)             | <0.001 |        |
|                                         | Taoyuan            | 5.47 (1.89 to 9.05)                | 0.003  |        |
|                                         | Yilan County       | 2.30 (-1.28 to 5.87)               | 0.209  |        |
|                                         | Yunlin County      | -6.04 (-9.61 to -2.46)             | <0.001 |        |
| Administrative division <sup>2</sup>    | Intercept (County) | 19.75 (18.41 to 21.09)             | <0.001 | <0.001 |
|                                         | City               | -0.17 (-2.97 to 2.62)              | 0.903  |        |
|                                         | Metropolis         | 0.79 (-1.40 to 2.98)               | 0.479  |        |
|                                         | Outer island       | -11.84 (-15.13 to -8.56)           | <0.001 |        |
| Geographical division <sup>3</sup>      | Intercept (West)   | 15.88 (14.18 to 17.59)             | <0.001 | <0.001 |
|                                         | East               | 20.87 (17.67 to 24.07)             | <0.001 |        |
|                                         | North              | 2.33 (0.09 to 4.57)                | 0.042  |        |
|                                         | Outer island       | -7.98 (-11.18 to -4.78)            | <0.001 |        |
|                                         | South              | 3.93 (1.51 to 6.35)                | 0.001  |        |
| Per capita gross domestic product (GDP) | Intercept          | 89.78 (58.28 to 121.28)            | <0.001 | <0.001 |
|                                         | New Taiwan Dollar  | -8.80E-05 (-1.27E-04 to -4.89E-05) | <0.001 |        |
| Population                              | Intercept          | 17.58 (16.22 to 18.95)             | <0.001 | 0.013  |
|                                         | Number of people   | 1.11E-06 (2.37E-07 to 1.97E-06)    | 0.013  |        |
| Higher education                        | Intercept          | 21.85 (18.14 to 25.57)             | <0.001 | 0.099  |
|                                         | %                  | -0.07 (-0.16 to 0.01)              | 0.099  |        |
| Plain area of a county                  | Intercept          | 18.54 (17.07 to 20.00)             | <0.001 | 0.614  |

|                                         |                                   |                                    |        |        |
|-----------------------------------------|-----------------------------------|------------------------------------|--------|--------|
|                                         | 10,000 m <sup>2</sup>             | 6.31E-06 (-1.82E-05 to 3.08E-05)   | 0.614  |        |
| Population density over the plain area  | Intercept                         | 18.56 (17.45 to 19.67)             | <0.001 | 0.359  |
|                                         | Person / 10,000 m <sup>2</sup>    | 4.25E-05 (-4.82E-05 to 1.33E-04)   | 0.359  |        |
| Population density over the county area | Intercept                         | 19.53 (18.35 to 20.70)             | <0.001 | 0.045  |
|                                         | Person / 1 km <sup>2</sup>        | -4.45E-04 (-8.79E-04 to -1.11E-05) | 0.045  |        |
| Fertility rate                          | Intercept                         | 20.38 (14.41 to 26.36)             | <0.001 | 0.605  |
|                                         | ‰                                 | -0.05 (-0.25 to 0.15)              | 0.605  |        |
| Stray dogs                              | Intercept                         | 13.58 (12.03 to 15.12)             | <0.001 | <0.001 |
|                                         | Number of stray dogs              | 7.51E-04 (5.73E-04 to 9.29E-04)    | <0.001 |        |
| Total pets                              | Intercept                         | 17.25 (15.77 to 18.72)             | <0.001 | 0.006  |
|                                         | Number of pet dogs and pet cats   | 1.44E-05 (4.16E-06 to 2.46E-05)    | 0.006  |        |
| Total managers                          | Intercept                         | 18.60 (17.39 to 19.81)             | <0.001 | 0.556  |
|                                         | Number of managers                | 0.02 (-0.04 to 0.07)               | 0.556  |        |
| Total ACOs                              | Intercept                         | 20.77 (19.13 to 22.41)             | <0.001 | 0.004  |
|                                         | Number of animal control officers | -0.34 (-0.57 to -0.10)             | 0.004  |        |
| Total vets                              | Intercept                         | 18.12 (16.80 to 19.45)             | <0.001 | 0.133  |
|                                         | Number of veterinarians           | 0.13 (-0.04 to 0.31)               | 0.133  |        |
| Working day                             | Intercept                         | 13.19 (3.62 to 22.77)              | 0.007  | 0.247  |
|                                         | Number of working days monthly    | 0.27 (-0.19 to 0.73)               | 0.247  |        |

<sup>1</sup>: confidence interval

<sup>2</sup>: administrative divisions in Taiwan (i.e., metropolis, city, county, and outer island)

<sup>3</sup>: geographical divisions (i.e., north, south, west, east, and outer island)

**Table S5 Table 8.** Univariable linear regression results for the indicator for the monthly workload of shelter veterinarians from 2018 to 2020.

| Covariate | Category                     | Estimate (95% CI <sup>1</sup> ) | P-value | P-value for the covariate |
|-----------|------------------------------|---------------------------------|---------|---------------------------|
| Year      | Intercept                    | 62.10 (56.20 to 67.99)          | <0.001  | <0.001                    |
|           | Year                         | 12.01 (7.45 to 16.58)           | <0.001  |                           |
| Month     | Intercept                    | 62.42 (54.38 to 70.45)          | <0.001  | 0.001                     |
|           | Month                        | 1.80 (0.71 to 2.89)             | 0.001   |                           |
| County    | Intercept (Taipei)           | 44.35 (32.24 to 56.45)          | <0.001  | <0.001                    |
|           | Chiayi County                | -14.04 (-31.16 to 3.08)         | 0.108   |                           |
|           | Chiayi City                  | 7.35 (-9.77 to 24.46)           | 0.401   |                           |
|           | Changhua County              | 79.10 (61.98 to 96.21)          | <0.001  |                           |
|           | Hsinchu County               | 119.93 (102.81 to 137.05)       | <0.001  |                           |
|           | Hsinchu City                 | 6.39 (-10.73 to 23.51)          | 0.465   |                           |
|           | Hualien County               | 85.12 (68.00 to 102.24)         | <0.001  |                           |
|           | Kaohsiung                    | 23.87 (6.75 to 40.99)           | 0.006   |                           |
|           | Keelung County               | 4.56 (-12.56 to 21.68)          | 0.602   |                           |
|           | Kinmen and Lienchiang County | 2.26 (-14.86 to 19.38)          | 0.796   |                           |
|           | Miaoli County                | 77.33 (60.21 to 94.45)          | <0.001  |                           |
|           | Nantou County                | -9.26 (-26.38 to 7.86)          | 0.290   |                           |
|           | New Taipei                   | 25.95 (8.83 to 43.07)           | 0.003   |                           |
|           | Penghu County                | 8.34 (-8.78 to 25.46)           | 0.340   |                           |
|           | Pingtung County              | 75.73 (58.62 to 92.85)          | <0.001  |                           |
|           | Taichung                     | 50.31 (33.19 to 67.43)          | <0.001  |                           |

|                                      |                    |                           |        |        |
|--------------------------------------|--------------------|---------------------------|--------|--------|
|                                      | Tainan             | 20.16 (3.05 to 37.28)     | 0.021  |        |
|                                      | Taitung County     | -2.38 (-19.50 to 14.74)   | 0.785  |        |
|                                      | Taoyuan            | 67.65 (50.54 to 84.77)    | <0.001 |        |
|                                      | Yilan County       | 21.00 (3.89 to 38.12)     | 0.016  |        |
|                                      | Yunlin County      | -24.37 (-41.49 to -7.26)  | 0.005  |        |
| Administrative division <sup>2</sup> | Intercept (County) | 85.17 (79.86 to 90.48)    | <0.001 | <0.001 |
|                                      | City               | -34.72 (-45.77 to -23.66) | <0.001 |        |
|                                      | Metropolis         | -9.49 (-18.16 to -0.82)   | 0.032  |        |
|                                      | Outer island       | -35.52 (-48.52 to -22.51) | <0.001 |        |
| Geographical division <sup>3</sup>   | Intercept (West)   | 78.97 (71.32 to 86.62)    | <0.001 | <0.001 |
|                                      | East               | 6.75 (-7.57 to 21.07)     | 0.356  |        |
|                                      | North              | 0.45 (-9.57 to 10.47)     | 0.930  |        |
|                                      | Outer island       | -29.32 (-43.64 to -15.00) | <0.001 |        |
|                                      | South              | -12.01 (-22.83 to -1.18)  | 0.030  |        |

<sup>1</sup>: confidence interval

<sup>2</sup>: administrative divisions in Taiwan (i.e., metropolis, city, county, and outer island)

<sup>3</sup>: geographical divisions (i.e., north, south, west, east, and outer island)
