# Supplementary material for: Trends in Animal Shelter Management, Adoption, and Animal Death in Taiwan from 2012 to 2020
Source: MDPI journal article supplement (doi:10.3390/ani13091451), 2023-04-24
Supplement: s1 [file s1]

**Table S4 Table 1.** The complete table of total number and percentage of public animal shelter intakes for different reasons for each county from 2018 to 2020.

| County            | Capture        | Consignation  | Relinquishment | Rescue        | Confiscation | Capture and Rescue | Other       | Total  |
|-------------------|----------------|---------------|----------------|---------------|--------------|--------------------|-------------|--------|
| Chiayi County     | 1,830 (89.1%)  | 42 (2.0%)     | 10 (0.5%)      | 25 (1.2%)     | 16 (0.8%)    | 1,855 (90.4%)      | 130 (6.3%)  | 2,053  |
| Chiayi City       | 391 (41.7%)    | 327 (34.9%)   | 147 (15.7%)    | 0 (0.0%)      | 11 (1.2%)    | 391 (41.7%)        | 62 (6.6%)   | 938    |
| Changhua County   | 2,891 (64.6%)  | 985 (22.0%)   | 132 (3.0%)     | 340 (7.6%)    | 36 (0.8%)    | 3,231 (72.2%)      | 89 (2.0%)   | 4,473  |
| Hsinchu County    | 361 (23.6%)    | 603 (39.5%)   | 108 (7.1%)     | 385 (25.2%)   | 69 (4.5%)    | 746 (48.8%)        | 2 (0.1%)    | 1,528  |
| Hsinchu City      | 987 (59.4%)    | 536 (32.3%)   | 57 (3.4%)      | 67 (4.0%)     | 0 (0.0%)     | 1,054 (63.4%)      | 15 (0.9%)   | 1,662  |
| Hualien County    | 946 (61.4%)    | 273 (17.7%)   | 7 (0.5%)       | 47 (3.1%)     | 4 (0.3%)     | 993 (64.5%)        | 263 (17.1%) | 1,540  |
| Kaohsiung         | 10,304 (72.9%) | 1,458 (10.3%) | 242 (1.7%)     | 1,834 (13.0%) | 59 (0.4%)    | 12,138 (85.9%)     | 228 (1.6%)  | 14,125 |
| Keelung County    | 598 (46.0%)    | 504 (38.8%)   | 15 (1.2%)      | 126 (9.7%)    | 45 (3.5%)    | 724 (55.7%)        | 11 (0.8%)   | 1,299  |
| Kinmen County     | 2,155 (81.2%)  | 415 (15.6%)   | 33 (1.2%)      | 43 (1.6%)     | 0 (0.0%)     | 2,198 (82.8%)      | 7 (0.3%)    | 2,653  |
| Lienchiang County | 58 (90.6%)     | 0 (0.0%)      | 3 (4.7%)       | 3 (4.7%)      | 0 (0.0%)     | 61 (95.3%)         | 0 (0.0%)    | 64     |
| Miaoli County     | 3,102 (70.1%)  | 1,032 (23.3%) | 66 (1.5%)      | 206 (4.7%)    | 0 (0.0%)     | 3,308 (74.7%)      | 20 (0.5%)   | 4,426  |
| Nantou County     | 1,041 (64.3%)  | 328 (20.3%)   | 95 (5.9%)      | 140 (8.7%)    | 4 (0.2%)     | 1,181 (73.0%)      | 10 (0.6%)   | 1,618  |
| New Taipei        | 9,965 (55.0%)  | 5,807 (32.0%) | 399 (2.2%)     | 990 (5.5%)    | 3 (0.0%)     | 10,955 (60.4%)     | 968 (5.3%)  | 18,132 |
| Penghu County     | 1,120 (69.3%)  | 400 (24.8%)   | 30 (1.9%)      | 32 (2.0%)     | 0 (0.0%)     | 1,152 (71.3%)      | 34 (2.1%)   | 1,616  |
| Pingtung County   | 1,073 (48.9%)  | 101 (4.6%)    | 7 (0.3%)       | 813 (37.1%)   | 6 (0.3%)     | 1,886 (86.0%)      | 193 (8.8%)  | 2,193  |
| Taichung          | 10,652 (46.4%) | 8,788 (38.3%) | 877 (3.8%)     | 2,533 (11.0%) | 118 (0.5%)   | 13,185 (57.4%)     | 1 (0.0%)    | 22,969 |
| Tainan            | 13,425 (58.9%) | 8,940 (39.2%) | 402 (1.8%)     | 22 (0.1%)     | 0 (0.0%)     | 13,447 (59.0%)     | 0 (0.0%)    | 22,789 |
| Taipei            | 546 (6.4%)     | 871 (10.2%)   | 355 (4.1%)     | 6,741 (78.6%) | 0 (0.0%)     | 7,287 (85.0%)      | 63 (0.7%)   | 8,576  |
| Taitung County    | 200 (12.0%)    | 1,342 (80.5%) | 78 (4.7%)      | 30 (1.8%)     | 0 (0.0%)     | 230 (13.8%)        | 17 (1.0%)   | 1,667  |
| Taoyuan           | 9,520 (66.2%)  | 1,929 (13.4%) | 440 (3.1%)     | 2,175 (15.1%) | 1 (0.0%)     | 11,695 (81.3%)     | 317 (2.2%)  | 14,382 |
| Yilan County      | 2,078 (45.9%)  | 659 (14.6%)   | 469 (10.4%)    | 1,318 (29.1%) | 0 (0.0%)     | 3,396 (75.1%)      | 0 (0.0%)    | 4,524  |
| Yunlin County     | 1,340 (76.4%)  | 0 (0.0%)      | 16 (0.9%)      | 116 (6.6%)    | 267 (15.2%)  | 1,456 (83.1%)      | 14 (0.8%)   | 1,753  |

**Table S4 Table 2.** The complete table of total number and percentage of public animal shelter outcomes for different reasons for each county from 2018 to 2020.

| County            | Reclamation   | Adoption       | Euthanasia | Unassisted death | TNVR <sup>1</sup> | Escape     | Other         | Total  |
|-------------------|---------------|----------------|------------|------------------|-------------------|------------|---------------|--------|
| Chiayi County     | 28 (1.3%)     | 538 (25.5%)    | 6 (0.3%)   | 120 (5.7%)       | 1,324 (62.8%)     | 27 (1.3%)  | 64 (3.0%)     | 2,107  |
| Chiayi City       | 55 (6.0%)     | 740 (80.2%)    | 24 (2.6%)  | 35 (3.8%)        | 60 (6.5%)         | 8 (0.9%)   | 1 (0.1%)      | 923    |
| Changhua County   | 136 (3.1%)    | 2,876 (65.1%)  | 0 (0.0%)   | 508 (11.5%)      | 819 (18.6%)       | 76 (1.7%)  | 0 (0.0%)      | 4,415  |
| Hsinchu County    | 78 (5.5%)     | 1,033 (72.3%)  | 0 (0.0%)   | 135 (9.4%)       | 143 (10.0%)       | 39 (2.7%)  | 1 (0.1%)      | 1,429  |
| Hsinchu City      | 103 (6.5%)    | 713 (45.0%)    | 32 (2.0%)  | 182 (11.5%)      | 525 (33.2%)       | 26 (1.6%)  | 2 (0.1%)      | 1,583  |
| Hualien County    | 59 (3.7%)     | 692 (43.7%)    | 42 (2.7%)  | 56 (3.5%)        | 731 (46.1%)       | 4 (0.3%)   | 0 (0.0%)      | 1,584  |
| Kaohsiung         | 658 (4.8%)    | 11,333 (83.0%) | 0 (0.0%)   | 746 (5.5%)       | 235 (1.7%)        | 37 (0.3%)  | 646 (4.7%)    | 13,655 |
| Keelung County    | 216 (16.1%)   | 902 (67.2%)    | 0 (0.0%)   | 150 (11.2%)      | 1 (0.1%)          | 14 (1.0%)  | 59 (4.4%)     | 1,342  |
| Kinmen County     | 133 (5.1%)    | 661 (25.3%)    | 6 (0.2%)   | 82 (3.1%)        | 1,726 (66.1%)     | 0 (0.0%)   | 2 (0.1%)      | 2,610  |
| Lienchiang County | 11 (20.8%)    | 38 (71.7%)     | 0 (0.0%)   | 4 (7.5%)         | 0 (0.0%)          | 0 (0.0%)   | 0 (0.0%)      | 53     |
| Miaoli County     | 117 (2.7%)    | 1,189 (27.4%)  | 35 (0.8%)  | 625 (14.4%)      | 2,254 (52.0%)     | 112 (2.6%) | 3 (0.1%)      | 4,335  |
| Nantou County     | 159 (9.6%)    | 758 (45.7%)    | 19 (1.1%)  | 84 (5.1%)        | 632 (38.1%)       | 5 (0.3%)   | 0 (0.0%)      | 1,657  |
| New Taipei        | 2,193 (12.2%) | 14,657 (81.4%) | 0 (0.0%)   | 913 (5.1%)       | 47 (0.3%)         | 62 (0.3%)  | 129 (0.7%)    | 18,001 |
| Penghu County     | 51 (3.8%)     | 716 (52.8%)    | 38 (2.8%)  | 530 (39.1%)      | 0 (0.0%)          | 14 (1.0%)  | 8 (0.6%)      | 1,357  |
| Pingtung County   | 48 (2.3%)     | 1,088 (51.1%)  | 11 (0.5%)  | 22 (1.0%)        | 959 (45.0%)       | 0 (0.0%)   | 2 (0.1%)      | 2,130  |
| Taichung          | 1,183 (5.1%)  | 10,570 (45.9%) | 97 (0.4%)  | 1,485 (6.4%)     | 9,603 (41.7%)     | 110 (0.5%) | 0 (0.0%)      | 23,048 |
| Tainan            | 777 (3.5%)    | 10,748 (48.4%) | 0 (0.0%)   | 1,026 (4.6%)     | 9,595 (43.2%)     | 52 (0.2%)  | 2 (0.0%)      | 22,200 |
| Taipei            | 2,029 (25.0%) | 5,364 (66.1%)  | 9 (0.1%)   | 554 (6.8%)       | 3 (0.0%)          | 141 (1.7%) | 17 (0.2%)     | 8,117  |
| Taitung County    | 122 (7.4%)    | 1,488 (90.1%)  | 10 (0.6%)  | 21 (1.3%)        | 2 (0.1%)          | 8 (0.5%)   | 1 (0.1%)      | 1,652  |
| Taoyuan           | 607 (4.3%)    | 6,481 (46.3%)  | 50 (0.4%)  | 525 (3.7%)       | 5,032 (35.9%)     | 68 (0.5%)  | 1,245 (8.9%)  | 14,008 |
| Yilan County      | 374 (8.6%)    | 2,054 (47.1%)  | 38 (0.9%)  | 370 (8.5%)       | 0 (0.0%)          | 0 (0.0%)   | 1,521 (34.9%) | 4,357  |
| Yunlin County     | 2 (0.1%)      | 1,298 (79.2%)  | 0 (0.0%)   | 313 (19.1%)      | 0 (0.0%)          | 5 (0.3%)   | 20 (1.2%)     | 1,638  |

<sup>1</sup>: trap-neuter-vaccinate-return
