# Supplementary material for: Trends in Animal Shelter Management, Adoption, and Animal Death in Taiwan from 2012 to 2020
Source: MDPI journal article supplement (doi:10.3390/ani13091451), 2023-04-24
Supplement: s1 [file s1]

**Table S6.** Final multivariable linear regression models.**Table S6 Table 1.** Final multivariable linear regression model for logarithmic transformation of monthly shelter animal intakes over the maximum shelter capacity from 2012 to 2020.

| <b>Covariate</b>   | <b>Category</b>              | <b>Estimate (95% CI<sup>1</sup>)</b> | <b>P-value</b> |
|--------------------|------------------------------|--------------------------------------|----------------|
| Intercept          |                              | 4.20 (3.81 to 4.58)                  | <0.001         |
| Year               | Year                         | -0.08 (-0.12 to -0.05)               | <0.001         |
| County             | Chiayi County                | -0.23 (-0.67 to 0.21)                | 0.314          |
|                    | Chiayi City                  | -0.40 (-0.84 to 0.04)                | 0.077          |
|                    | Changhua County              | -0.08 (-0.52 to 0.36)                | 0.715          |
|                    | Hsinchu County               | -0.19 (-0.62 to 0.25)                | 0.408          |
|                    | Hsinchu City                 | -1.43 (-1.87 to -0.99)               | <0.001         |
|                    | Hualien County               | 0.11 (-0.33 to 0.55)                 | 0.618          |
|                    | Kaohsiung                    | 0.07 (-0.37 to 0.50)                 | 0.771          |
|                    | Keelung County               | -0.34 (-0.77 to 0.10)                | 0.137          |
|                    | Kinmen and Lienchiang County | -0.72 (-1.16 to -0.28)               | 0.002          |
|                    | Miaoli County                | -0.02 (-0.45 to 0.42)                | 0.944          |
|                    | Nantou County                | -1.20 (-1.64 to -0.76)               | <0.001         |
|                    | New Taipei                   | -0.38 (-0.82 to 0.06)                | 0.090          |
|                    | Penghu County                | -1.34 (-1.78 to -0.90)               | <0.001         |
|                    | Pingtung County              | 0.61 (0.17 to 1.05)                  | 0.007          |
|                    | Taichung                     | 1.12 (0.68 to 1.55)                  | <0.001         |
|                    | Tainan                       | 0.71 (0.27 to 1.15)                  | 0.002          |
|                    | Taitung County               | 0.17 (-0.27 to 0.61)                 | 0.449          |
|                    | Taoyuan                      | 0.07 (-0.36 to 0.51)                 | 0.739          |
|                    | Yilan County                 | -0.02 (-0.45 to 0.42)                | 0.945          |
|                    | Yunlin County                | -0.97 (-1.41 to -0.53)               | <0.001         |
| Euthanasia         | Yes/No                       | 0.19 (-0.26 to 0.63)                 | 0.412          |
| County: Euthanasia | Chiayi County: Euthanasia    | 1.59 (1.00 to 2.18)                  | <0.001         |
|                    | Chiayi City: Euthanasia      | 0.45 (-0.13 to 1.04)                 | 0.132          |
|                    | Changhua County: Euthanasia  | 0.85 (0.26 to 1.44)                  | 0.005          |
|                    | Hsinchu County: Euthanasia   | 1.04 (0.45 to 1.63)                  | <0.001         |
|                    | Hsinchu City: Euthanasia     | 0.49 (-0.10 to 1.08)                 | 0.107          |
|                    | Hualien County: Euthanasia   | 0.84 (0.26 to 1.43)                  | 0.006          |
|                    | Kaohsiung: Euthanasia        | -0.13 (-0.72 to 0.46)                | 0.657          |
|                    | Keelung County: Euthanasia   | 0.61 (0.02 to 1.20)                  | 0.044          |

|                               |                       |        |
|-------------------------------|-----------------------|--------|
| Kinmen and Lienchiang County: |                       |        |
| Euthanasia                    | -0.18 (-0.77 to 0.41) | 0.553  |
| Miaoli County: Euthanasia     | 0.07 (-0.52 to 0.66)  | 0.817  |
| Nantou County: Euthanasia     | 1.65 (1.07 to 2.24)   | <0.001 |
| New Taipei: Euthanasia        | 0.05 (-0.54 to 0.64)  | 0.861  |
| Penghu County: Euthanasia     | 0.10 (-0.49 to 0.69)  | 0.732  |
| Pingtung County: Euthanasia   | 1.17 (0.58 to 1.76)   | <0.001 |
| Taichung: Euthanasia          | -0.51 (-1.10 to 0.08) | 0.091  |
| Tainan: Euthanasia            | -0.19 (-0.78 to 0.40) | 0.523  |
| Taitung County: Euthanasia    | 0.61 (0.02 to 1.20)   | 0.045  |
| Taoyuan: Euthanasia           | 0.13 (-0.45 to 0.72)  | 0.654  |
| Yilan County: Euthanasia      | 0.24 (-0.35 to 0.83)  | 0.432  |
| Yunlin County: Euthanasia     | 1.34 (0.76 to 1.93)   | <0.001 |

<sup>1</sup>: confidence interval

**Table S6 Table 2.** Final multivariable linear regression model for logarithmic transformation of monthly shelter animal outcomes over the maximum shelter capacity from 2012 to 2020.

| <b>Covariate</b>   | <b>Category</b>                          | <b>Estimate (95% CI<sup>1</sup>)</b> | <b>P-value</b> |
|--------------------|------------------------------------------|--------------------------------------|----------------|
| Intercept          |                                          | 4.13 (3.82 to 4.44)                  | <0.001         |
| Year               | Year                                     | -0.09 (-0.11 to -0.06)               | <0.001         |
| County             | Chiayi County                            | -0.67 (-1.03 to -0.32)               | <0.001         |
|                    | Chiayi City                              | -0.37 (-0.73 to -0.01)               | 0.043          |
|                    | Changhua County                          | -0.13 (-0.48 to 0.23)                | 0.489          |
|                    | Hsinchu County                           | -0.23 (-0.58 to 0.13)                | 0.213          |
|                    | Hsinchu City                             | -1.61 (-1.97 to -1.26)               | <0.001         |
|                    | Hualien County                           | -0.26 (-0.61 to 0.10)                | 0.161          |
|                    | Kaohsiung                                | 0.03 (-0.32 to 0.39)                 | 0.856          |
|                    | Keelung County                           | -0.26 (-0.62 to 0.10)                | 0.153          |
|                    | Kinmen and Lienchiang County             | -1.59 (-1.95 to -1.24)               | <0.001         |
|                    | Miaoli County                            | -0.57 (-0.93 to -0.22)               | 0.002          |
|                    | Nantou County                            | -1.41 (-1.77 to -1.06)               | <0.001         |
|                    | New Taipei                               | -0.31 (-0.66 to 0.05)                | 0.095          |
|                    | Penghu County                            | -1.45 (-1.80 to -1.09)               | <0.001         |
|                    | Pingtung County                          | 0.26 (-0.10 to 0.61)                 | 0.162          |
|                    | Taichung                                 | 0.73 (0.38 to 1.09)                  | <0.001         |
|                    | Tainan                                   | 0.37 (0.01 to 0.73)                  | 0.043          |
|                    | Taitung County                           | 0.25 (-0.11 to 0.60)                 | 0.175          |
|                    | Taoyuan                                  | -0.31 (-0.66 to 0.05)                | 0.092          |
|                    | Yilan County                             | -0.34 (-0.69 to 0.02)                | 0.066          |
|                    | Yunlin County                            | -1.03 (-1.38 to -0.67)               | <0.001         |
| Euthanasia         | Yes/No                                   | 0.11 (-0.25 to 0.47)                 | 0.548          |
| County: Euthanasia | Chiayi County: Euthanasia                | 2.06 (1.58 to 2.54)                  | <0.001         |
|                    | Chiayi City: Euthanasia                  | 0.52 (0.04 to 0.99)                  | 0.036          |
|                    | Changhua County: Euthanasia              | 0.86 (0.39 to 1.34)                  | <0.001         |
|                    | Hsinchu County: Euthanasia               | 1.21 (0.73 to 1.69)                  | <0.001         |
|                    | Hsinchu City: Euthanasia                 | 0.74 (0.27 to 1.22)                  | 0.003          |
|                    | Hualien County: Euthanasia               | 1.25 (0.77 to 1.72)                  | <0.001         |
|                    | Kaohsiung: Euthanasia                    | -0.28 (-0.76 to 0.19)                | 0.246          |
|                    | Keelung County: Euthanasia               | 0.57 (0.09 to 1.05)                  | 0.021          |
|                    | Kinmen and Lienchiang County: Euthanasia | 0.48 (4.63E-03 to 0.96)              | 0.050          |

|                             |                       |        |
|-----------------------------|-----------------------|--------|
| Miaoli County: Euthanasia   | 0.68 (0.20 to 1.16)   | 0.006  |
| Nantou County: Euthanasia   | 1.93 (1.45 to 2.41)   | <0.001 |
| New Taipei: Euthanasia      | -0.03 (-0.51 to 0.44) | 0.889  |
| Penghu County: Euthanasia   | -0.02 (-0.50 to 0.45) | 0.922  |
| Pingtung County: Euthanasia | 1.68 (1.20 to 2.16)   | <0.001 |
| Taichung: Euthanasia        | -0.05 (-0.53 to 0.43) | 0.834  |
| Tainan: Euthanasia          | 0.25 (-0.23 to 0.73)  | 0.305  |
| Taitung County: Euthanasia  | 0.61 (0.13 to 1.09)   | 0.014  |
| Taoyuan: Euthanasia         | 0.63 (0.15 to 1.11)   | 0.011  |
| Yilan County: Euthanasia    | 0.54 (0.06 to 1.01)   | 0.030  |
| Yunlin County: Euthanasia   | 1.54 (1.06 to 2.01)   | <0.001 |

<sup>1</sup>: confidence interval

**Table S6 Table 3.** Final multivariable linear regression model for the number of adopted animals over the shelter animal intakes per month from 2012 to 2020.

| <b>Covariate</b> | <b>Category</b>              | <b>Estimate (95% CI<sup>1</sup>)</b> | <b>P-value</b> |
|------------------|------------------------------|--------------------------------------|----------------|
| Intercept        |                              | 18.20 (-20.95 to 57.35)              | 0.364          |
| Year             | Year                         | 5.11 (3.79 to 6.43)                  | <0.001         |
| County           | Chiayi County                | -12.60 (-33.48 to 8.27)              | 0.238          |
|                  | Chiayi City                  | 14.22 (-5.67 to 34.11)               | 0.163          |
|                  | Changhua County              | -32.30 (-50.05 to -14.55)            | <0.001         |
|                  | Hsinchu County               | -12.39 (-30.09 to 5.31)              | 0.172          |
|                  | Hsinchu City                 | -21.01 (-38.82 to -3.20)             | 0.022          |
|                  | Hualien County               | -20.37 (-38.81 to -1.93)             | 0.032          |
|                  | Kaohsiung                    | -5.23 (-24.25 to 13.80)              | 0.591          |
|                  | Keelung County               | -2.89 (-24.25 to 18.47)              | 0.791          |
|                  | Kinmen and Lienchiang County | -58.33 (-76.07 to -40.59)            | <0.001         |
|                  | Miaoli County                | -35.85 (-53.92 to -17.77)            | <0.001         |
|                  | Nantou County                | -29.77 (-49.22 to -10.31)            | 0.003          |
|                  | New Taipei                   | 5.11 (-13.36 to 23.58)               | 0.589          |
|                  | Penghu County                | -36.60 (-54.29 to -18.91)            | <0.001         |
|                  | Pingtung County              | -27.74 (-48.77 to -6.71)             | 0.011          |
|                  | Taichung                     | -19.58 (-37.84 to -1.33)             | 0.037          |
|                  | Tainan                       | -4.47 (-23.61 to 14.67)              | 0.648          |
|                  | Taitung County               | 6.52 (-12.40 to 25.44)               | 0.500          |
|                  | Taoyuan                      | -14.18 (-31.88 to 3.53)              | 0.118          |
|                  | Yilan County                 | -30.97 (-50.04 to -11.91)            | 0.002          |
|                  | Yunlin County                | -6.46 (-25.64 to 12.72)              | 0.510          |
| Fertility rate   | ‰                            | 1.10 (0.21 to 2.00)                  | 0.016          |

<sup>1</sup>: confidence interval

**Table S6 Table 4.** Final multivariable linear regression model for square root transformation of the number of unassisted death animals over the shelter animal intakes per year from 2012 to 2020.

| <b>Covariate</b> | <b>Category</b>                    | <b>Estimate (95% CI<sup>1</sup>)</b> | <b>P-value</b> |
|------------------|------------------------------------|--------------------------------------|----------------|
| Intercept        |                                    | 3.80 (2.81 to 4.79)                  | <0.001         |
| Year             | Year                               | -0.06 (-0.34 to 0.21)                | 0.659          |
| County           | Chiayi County                      | 2.21 (0.81 to 3.62)                  | 0.003          |
|                  | Chiayi City                        | -0.61 (-2.01 to 0.79)                | 0.398          |
|                  | Changhua County                    | 1.65 (0.25 to 3.05)                  | 0.023          |
|                  | Hsinchu County                     | -0.61 (-2.01 to 0.79)                | 0.397          |
|                  | Hsinchu City                       | 0.62 (-0.78 to 2.02)                 | 0.387          |
|                  | Hualien County                     | 0.15 (-1.25 to 1.55)                 | 0.834          |
|                  | Kaohsiung                          | 2.51 (1.11 to 3.91)                  | <0.001         |
|                  | Keelung County                     | 0.18 (-1.22 to 1.58)                 | 0.801          |
|                  | Kinmen and Lienchiang County       | 0.25 (-1.15 to 1.65)                 | 0.729          |
|                  | Miaoli County                      | 2.21 (0.81 to 3.61)                  | 0.003          |
|                  | Nantou County                      | 2.55 (1.15 to 3.96)                  | <0.001         |
|                  | New Taipei                         | 0.94 (-0.46 to 2.34)                 | 0.191          |
|                  | Penghu County                      | 1.30 (-0.10 to 2.71)                 | 0.071          |
|                  | Pingtung County                    | -1.75 (-3.15 to -0.35)               | 0.016          |
|                  | Taichung                           | -0.30 (-1.70 to 1.10)                | 0.679          |
|                  | Tainan                             | 0.31 (-1.09 to 1.71)                 | 0.667          |
|                  | Taitung County                     | -0.44 (-1.84 to 0.96)                | 0.542          |
|                  | Taoyuan                            | -0.52 (-1.92 to 0.88)                | 0.469          |
|                  | Yilan County                       | 0.76 (-0.64 to 2.16)                 | 0.289          |
|                  | Yunlin County                      | -3.47 (-4.87 to -2.07)               | <0.001         |
| Year: County     | Year: Chiayi County                | -0.27 (-0.66 to 0.12)                | 0.173          |
|                  | Year: Chiayi City                  | 0.03 (-0.36 to 0.42)                 | 0.872          |
|                  | Year: Changhua County              | -0.24 (-0.62 to 0.15)                | 0.238          |
|                  | Year: Hsinchu County               | 0.20 (-0.19 to 0.59)                 | 0.322          |
|                  | Year: Hsinchu City                 | 0.04 (-0.35 to 0.43)                 | 0.854          |
|                  | Year: Hualien County               | -0.17 (-0.56 to 0.22)                | 0.396          |
|                  | Year: Kaohsiung                    | -0.56 (-0.95 to -0.17)               | 0.006          |
|                  | Year: Keelung County               | 0.13 (-0.26 to 0.51)                 | 0.529          |
|                  | Year: Kinmen and Lienchiang County | -0.20 (-0.59 to 0.19)                | 0.317          |
|                  | Year: Miaoli County                | -0.20 (-0.59 to 0.19)                | 0.310          |

|                       |                        |        |
|-----------------------|------------------------|--------|
| Year: Nantou County   | -0.51 (-0.90 to -0.12) | 0.011  |
| Year: New Taipei      | -0.28 (-0.66 to 0.11)  | 0.168  |
| Year: Penghu County   | 0.27 (-0.12 to 0.66)   | 0.175  |
| Year: Pingtung County | 0.15 (-0.24 to 0.54)   | 0.456  |
| Year: Taichung        | 0.09 (-0.30 to 0.48)   | 0.640  |
| Year: Tainan          | -0.12 (-0.50 to 0.27)  | 0.562  |
| Year: Taitung County  | -0.23 (-0.62 to 0.16)  | 0.250  |
| Year: Taoyuan         | 0.01 (-0.38 to 0.40)   | 0.960  |
| Year: Yilan County    | -0.05 (-0.44 to 0.34)  | 0.805  |
| Year: Yunlin County   | 1.16 (0.77 to 1.55)    | <0.001 |

<sup>1</sup>: confidence interval

**Table S6 Table 5.** Final multivariable linear regression model for logarithmic transformation of monthly shelter animal intakes over the maximum shelter capacity from 2018 to 2020.

| <b>Covariate</b>  | <b>Category</b>                | <b>Estimate (95% CI<sup>1</sup>)</b> | <b>P-value</b> |
|-------------------|--------------------------------|--------------------------------------|----------------|
| Intercept         |                                | 2.70 (2.33 to 3.06)                  | <0.001         |
| Year              | Year                           | 0.04 (-0.53 to 0.62)                 | 0.882          |
| County            | Chiayi County                  | -0.87 (-1.19 to -0.55)               | <0.001         |
|                   | Chiayi City                    | -0.78 (-1.10 to -0.46)               | <0.001         |
|                   | Changhua County                | -0.92 (-1.24 to -0.60)               | <0.001         |
|                   | Hsinchu County                 | -0.55 (-0.87 to -0.23)               | <0.001         |
|                   | Hsinchu City                   | -1.91 (-2.23 to -1.59)               | <0.001         |
|                   | Hualien County                 | -0.25 (-0.57 to 0.07)                | 0.126          |
|                   | Kaohsiung                      | -0.15 (-0.47 to 0.17)                | 0.359          |
|                   | Keelung County                 | -0.38 (-0.70 to -0.05)               | 0.022          |
|                   | Kinmen and Lienchiang County   | -0.85 (-1.17 to -0.53)               | <0.001         |
|                   | Miaoli County                  | -0.46 (-0.78 to -0.14)               | 0.005          |
|                   | Nantou County                  | -1.70 (-2.02 to -1.38)               | <0.001         |
|                   | New Taipei                     | -0.46 (-0.78 to -0.14)               | 0.005          |
|                   | Penghu County                  | -1.45 (-1.78 to -1.13)               | <0.001         |
|                   | Pingtung County                | -1.16 (-1.48 to -0.84)               | <0.001         |
|                   | Taichung                       | 1.01 (0.69 to 1.33)                  | <0.001         |
|                   | Tainan                         | 0.65 (0.33 to 0.97)                  | <0.001         |
|                   | Taitung County                 | -0.08 (-0.40 to 0.24)                | 0.620          |
|                   | Taoyuan                        | -0.16 (-0.48 to 0.16)                | 0.321          |
|                   | Yilan County                   | -0.36 (-0.68 to -0.04)               | 0.027          |
|                   | Yunlin County                  | -0.72 (-1.05 to -0.40)               | <0.001         |
| Working Day       | Number of working days monthly | 0.05 (0.04 to 0.06)                  | <0.001         |
| Year <sup>2</sup> | Year <sup>2</sup>              | -0.07 (-0.34 to 0.21)                | 0.635          |
| Year: County      | Year: Chiayi County            | -0.89 (-1.71 to -0.07)               | 0.033          |
|                   | Year: Chiayi City              | 0.09 (-0.73 to 0.91)                 | 0.828          |
|                   | Year: Changhua County          | 1.86 (1.05 to 2.68)                  | <0.001         |
|                   | Year: Hsinchu County           | 0.18 (-0.64 to 0.99)                 | 0.674          |
|                   | Year: Hsinchu City             | 0.82 (4.45E-03 to 1.64)              | 0.049          |
|                   | Year: Hualien County           | 0.26 (-0.56 to 1.07)                 | 0.539          |
|                   | Year: Kaohsiung                | 0.36 (-0.45 to 1.18)                 | 0.382          |
|                   | Year: Keelung County           | -0.33 (-1.14 to 0.49)                | 0.435          |



|                                           |                                     |                              |
|-------------------------------------------|-------------------------------------|------------------------------|
| Year: Kinmen and Lienchiang               |                                     |                              |
| County                                    | -0.10 (-0.92 to 0.72)               | 0.812                        |
| Year: Miaoli County                       | 0.18 (-0.64 to 1.00)                | 0.669                        |
| Year: Nantou County                       | -4.43E-03 (-0.82 to 0.81)           | 0.992                        |
| Year: New Taipei                          | 0.18 (-0.64 to 1.00)                | 0.669                        |
| Year: Penghu County                       | 0.28 (-0.53 to 1.10)                | 0.495                        |
| Year: Pingtung County                     | 2.56 (1.74 to 3.38)                 | <0.001                       |
| Year: Taichung                            | 0.28 (-0.54 to 1.10)                | 0.499                        |
| Year: Tainan                              | 0.21 (-0.60 to 1.03)                | 0.607                        |
| Year: Taitung County                      | -0.16 (-0.98 to 0.66)               | 0.702                        |
| Year: Taoyuan                             | 0.43 (-0.39 to 1.25)                | 0.302                        |
| Year: Yilan County                        | 0.27 (-0.54 to 1.09)                | 0.512                        |
| Year: Yunlin County                       | 0.52 (-0.30 to 1.34)                | 0.211                        |
| Year <sup>2</sup> : County                | Year <sup>2</sup> : Chiayi County   | 0.88 (0.49 to 1.27) <0.001   |
|                                           | Year <sup>2</sup> : Chiayi City     | 0.03 (-0.36 to 0.43) 0.862   |
|                                           | Year <sup>2</sup> : Changhua County | -0.58 (-0.97 to -0.18) 0.004 |
|                                           | Year <sup>2</sup> : Hsinchu County  | 0.09 (-0.30 to 0.48) 0.656   |
|                                           | Year <sup>2</sup> : Hsinchu City    | -0.13 (-0.52 to 0.26) 0.515  |
|                                           | Year <sup>2</sup> : Hualien County  | 0.02 (-0.38 to 0.41) 0.931   |
|                                           | Year <sup>2</sup> : Kaohsiung       | -0.10 (-0.49 to 0.29) 0.612  |
|                                           | Year <sup>2</sup> : Keelung County  | 0.13 (-0.27 to 0.52) 0.531   |
| Year <sup>2</sup> : Kinmen and Lienchiang |                                     |                              |
| County                                    | 0.16 (-0.23 to 0.56)                | 0.413                        |
| Year <sup>2</sup> : Miaoli County         | 0.15 (-0.24 to 0.54)                | 0.460                        |
| Year <sup>2</sup> : Nantou County         | 0.27 (-0.12 to 0.66)                | 0.175                        |
| Year <sup>2</sup> : New Taipei            | -0.09 (-0.48 to 0.31)               | 0.669                        |
| Year <sup>2</sup> : Penghu County         | -0.05 (-0.44 to 0.35)               | 0.815                        |
| Year <sup>2</sup> : Pingtung County       | -0.78 (-1.17 to -0.39)              | <0.001                       |
| Year <sup>2</sup> : Taichung              | -0.08 (-0.47 to 0.32)               | 0.705                        |
| Year <sup>2</sup> : Tainan                | -0.07 (-0.47 to 0.32)               | 0.716                        |
| Year <sup>2</sup> : Taitung County        | 0.12 (-0.28 to 0.51)                | 0.558                        |
| Year <sup>2</sup> : Taoyuan               | -0.06 (-0.46 to 0.33)               | 0.748                        |
| Year <sup>2</sup> : Yilan County          | 0.02 (-0.37 to 0.41)                | 0.925                        |
| Year <sup>2</sup> : Yunlin County         | -0.55 (-0.94 to -0.16)              | 0.006                        |

<sup>1</sup>: confidence interval

**Table S6 Table 6.** Final multivariable linear regression model for logarithmic transformation of monthly shelter animal outcomes over the maximum shelter capacity from 2018 to 2020.

| <b>Covariate</b>  | <b>Category</b>                | <b>Estimate (95% CI<sup>1</sup>)</b> | <b>P-value</b> |
|-------------------|--------------------------------|--------------------------------------|----------------|
| Intercept         |                                | 2.66 (2.28 to 3.04)                  | <0.001         |
| Year              | Year                           | -0.06 (-0.67 to 0.54)                | 0.834          |
| County            | Chiayi County                  | -0.90 (-1.23 to -0.56)               | <0.001         |
|                   | Chiayi City                    | -0.67 (-1.01 to -0.33)               | <0.001         |
|                   | Changhua County                | -0.86 (-1.20 to -0.53)               | <0.001         |
|                   | Hsinchu County                 | -0.47 (-0.81 to -0.14)               | 0.006          |
|                   | Hsinchu City                   | -2.01 (-2.35 to -1.67)               | <0.001         |
|                   | Hualien County                 | -0.19 (-0.52 to 0.15)                | 0.271          |
|                   | Kaohsiung                      | -0.15 (-0.49 to 0.19)                | 0.380          |
|                   | Keelung County                 | -0.33 (-0.67 to 2.79E-03)            | 0.052          |
|                   | Kinmen and Lienchiang County   | -0.82 (-1.16 to -0.48)               | <0.001         |
|                   | Miaoli County                  | -0.34 (-0.67 to 7.84E-04)            | 0.051          |
|                   | Nantou County                  | -1.71 (-2.05 to -1.37)               | <0.001         |
|                   | New Taipei                     | -0.40 (-0.73 to -0.06)               | 0.021          |
|                   | Penghu County                  | -1.65 (-1.99 to -1.32)               | <0.001         |
|                   | Pingtung County                | -1.00 (-1.33 to -0.66)               | <0.001         |
|                   | Taichung                       | 1.06 (0.73 to 1.40)                  | <0.001         |
|                   | Tainan                         | 0.63 (0.29 to 0.97)                  | <0.001         |
|                   | Taitung County                 | -0.03 (-0.37 to 0.30)                | 0.852          |
|                   | Taoyuan                        | -0.13 (-0.47 to 0.20)                | 0.433          |
|                   | Yilan County                   | -0.51 (-0.85 to -0.18)               | 0.003          |
|                   | Yunlin County                  | -0.93 (-1.27 to -0.60)               | <0.001         |
| Working Day       | Number of working days monthly | 0.05 (0.03 to 0.06)                  | <0.001         |
| Year <sup>2</sup> | Year <sup>2</sup>              | -3.04E-03 (-0.29 to 0.29)            | 0.984          |
| Year: County      | Year: Chiayi County            | -1.00 (-1.86 to -0.15)               | 0.022          |
|                   | Year: Chiayi City              | -0.18 (-1.04 to 0.67)                | 0.675          |
|                   | Year: Changhua County          | 1.63 (0.77 to 2.49)                  | <0.001         |
|                   | Year: Hsinchu County           | 0.12 (-0.74 to 0.97)                 | 0.787          |
|                   | Year: Hsinchu City             | 0.70 (-0.15 to 1.56)                 | 0.108          |
|                   | Year: Hualien County           | 0.47 (-0.38 to 1.33)                 | 0.280          |
|                   | Year: Kaohsiung                | 0.46 (-0.40 to 1.32)                 | 0.293          |
|                   | Year: Keelung County           | -0.20 (-1.05 to 0.66)                | 0.651          |

|                                           |                                     |                        |        |
|-------------------------------------------|-------------------------------------|------------------------|--------|
| Year: Kinmen and Lienchiang               |                                     |                        |        |
|                                           | County                              | -0.37 (-1.23 to 0.49)  | 0.396  |
|                                           | Year: Miaoli County                 | -0.09 (-0.95 to 0.77)  | 0.836  |
|                                           | Year: Nantou County                 | 0.19 (-0.67 to 1.05)   | 0.664  |
|                                           | Year: New Taipei                    | 0.20 (-0.66 to 1.05)   | 0.652  |
|                                           | Year: Penghu County                 | 0.51 (-0.34 to 1.37)   | 0.241  |
|                                           | Year: Pingtung County               | 2.53 (1.67 to 3.39)    | <0.001 |
|                                           | Year: Taichung                      | 0.41 (-0.45 to 1.26)   | 0.354  |
|                                           | Year: Tainan                        | 0.42 (-0.43 to 1.28)   | 0.332  |
|                                           | Year: Taitung County                | -0.06 (-0.92 to 0.80)  | 0.889  |
|                                           | Year: Taoyuan                       | 0.55 (-0.31 to 1.41)   | 0.208  |
|                                           | Year: Yilan County                  | 0.67 (-0.19 to 1.52)   | 0.128  |
|                                           | Year: Yunlin County                 | 1.00 (0.15 to 1.86)    | 0.022  |
| Year <sup>2</sup> : County                | Year <sup>2</sup> : Chiayi County   | 0.93 (0.51 to 1.34)    | <0.001 |
|                                           | Year <sup>2</sup> : Chiayi City     | 0.16 (-0.25 to 0.58)   | 0.436  |
|                                           | Year <sup>2</sup> : Changhua County | -0.44 (-0.85 to -0.03) | 0.037  |
|                                           | Year <sup>2</sup> : Hsinchu County  | 0.08 (-0.33 to 0.49)   | 0.699  |
|                                           | Year <sup>2</sup> : Hsinchu City    | -0.04 (-0.45 to 0.37)  | 0.842  |
|                                           | Year <sup>2</sup> : Hualien County  | -0.10 (-0.51 to 0.31)  | 0.626  |
|                                           | Year <sup>2</sup> : Kaohsiung       | -0.16 (-0.57 to 0.26)  | 0.460  |
|                                           | Year <sup>2</sup> : Keelung County  | 0.05 (-0.36 to 0.46)   | 0.801  |
| Year <sup>2</sup> : Kinmen and Lienchiang |                                     |                        |        |
|                                           | County                              | 0.27 (-0.14 to 0.69)   | 0.193  |
|                                           | Year <sup>2</sup> : Miaoli County   | 0.25 (-0.16 to 0.66)   | 0.235  |
|                                           | Year <sup>2</sup> : Nantou County   | 0.17 (-0.24 to 0.58)   | 0.410  |
|                                           | Year <sup>2</sup> : New Taipei      | -0.11 (-0.52 to 0.30)  | 0.603  |
|                                           | Year <sup>2</sup> : Penghu County   | -0.23 (-0.64 to 0.18)  | 0.273  |
|                                           | Year <sup>2</sup> : Pingtung County | -0.79 (-1.20 to -0.37) | <0.001 |
|                                           | Year <sup>2</sup> : Taichung        | -0.14 (-0.55 to 0.27)  | 0.509  |
|                                           | Year <sup>2</sup> : Tainan          | -0.16 (-0.57 to 0.25)  | 0.438  |
|                                           | Year <sup>2</sup> : Taitung County  | 0.06 (-0.35 to 0.47)   | 0.772  |
|                                           | Year <sup>2</sup> : Taoyuan         | -0.13 (-0.54 to 0.28)  | 0.535  |
|                                           | Year <sup>2</sup> : Yilan County    | -0.14 (-0.55 to 0.28)  | 0.519  |
|                                           | Year <sup>2</sup> : Yunlin County   | -0.76 (-1.17 to -0.35) | <0.001 |

<sup>1</sup>: confidence interval

**Table S6 Table 7.** Final multivariable linear regression model for square root transformation of the number of adopted animals over the number of animals entering and staying at shelters per month from 2018 to 2020.

| <b>Covariate</b>  | <b>Category</b>                | <b>Estimate (95% CI<sup>1</sup>)</b> | <b>P-value</b> |
|-------------------|--------------------------------|--------------------------------------|----------------|
| Intercept         |                                | 3.47 (2.83 to 4.11)                  | <0.001         |
| Year              | Year                           | -0.76 (-1.77 to 0.26)                | 0.144          |
| County            | Chiayi County                  | -1.65 (-2.21 to -1.09)               | <0.001         |
|                   | Chiayi City                    | 1.02 (0.46 to 1.58)                  | <0.001         |
|                   | Changhua County                | 0.54 (-0.02 to 1.10)                 | 0.060          |
|                   | Hsinchu County                 | 1.77 (1.21 to 2.33)                  | <0.001         |
|                   | Hsinchu City                   | -0.28 (-0.85 to 0.28)                | 0.324          |
|                   | Hualien County                 | -0.09 (-0.65 to 0.48)                | 0.763          |
|                   | Kaohsiung                      | 0.80 (0.24 to 1.36)                  | 0.005          |
|                   | Keelung County                 | 0.52 (-0.05 to 1.08)                 | 0.073          |
|                   | Kinmen and Lienchiang County   | -0.62 (-1.18 to -0.06)               | 0.031          |
|                   | Miaoli County                  | -0.54 (-1.10 to 0.03)                | 0.062          |
|                   | Nantou County                  | -1.62 (-2.18 to -1.06)               | <0.001         |
|                   | New Taipei                     | 0.79 (0.23 to 1.35)                  | 0.006          |
|                   | Penghu County                  | -1.56 (-2.13 to -1.00)               | <0.001         |
|                   | Pingtung County                | 2.05 (1.49 to 2.62)                  | <0.001         |
|                   | Taichung                       | 0.77 (0.21 to 1.34)                  | 0.007          |
|                   | Tainan                         | 1.30 (0.74 to 1.86)                  | <0.001         |
|                   | Taitung County                 | 3.45 (2.89 to 4.02)                  | <0.001         |
|                   | Taoyuan                        | 0.78 (0.22 to 1.34)                  | 0.007          |
|                   | Yilan County                   | -0.77 (-1.34 to -0.21)               | 0.007          |
|                   | Yunlin County                  | -0.99 (-1.55 to -0.42)               | <0.001         |
| Working Day       | Number of working days monthly | 0.03 (0.01 to 0.06)                  | 0.011          |
| Year <sup>2</sup> | Year <sup>2</sup>              | 0.15 (-0.34 to 0.63)                 | 0.557          |
| Year: County      | Year: Chiayi County            | 0.55 (-0.88 to 1.99)                 | 0.451          |
|                   | Year: Chiayi City              | 0.99 (-0.45 to 2.42)                 | 0.177          |
|                   | Year: Changhua County          | 1.28E-03 (-1.43 to 1.44)             | 0.999          |
|                   | Year: Hsinchu County           | -1.68 (-3.11 to -0.24)               | 0.022          |
|                   | Year: Hsinchu City             | -0.28 (-1.72 to 1.15)                | 0.700          |
|                   | Year: Hualien County           | 1.25 (-0.19 to 2.68)                 | 0.089          |
|                   | Year: Kaohsiung                | 0.90 (-0.54 to 2.33)                 | 0.222          |
|                   | Year: Keelung County           | 1.99 (0.56 to 3.43)                  | 0.007          |

|                                           |                                     |                              |
|-------------------------------------------|-------------------------------------|------------------------------|
| Year: Kinmen and Lienchiang               |                                     |                              |
| County                                    | -0.06 (-1.50 to 1.38)               | 0.935                        |
| Year: Miaoli County                       | 0.49 (-0.95 to 1.93)                | 0.504                        |
| Year: Nantou County                       | 0.52 (-0.92 to 1.95)                | 0.479                        |
| Year: New Taipei                          | 0.51 (-0.93 to 1.94)                | 0.488                        |
| Year: Penghu County                       | 1.73 (0.29 to 3.16)                 | 0.018                        |
| Year: Pingtung County                     | -2.23 (-3.66 to -0.79)              | 0.002                        |
| Year: Taichung                            | 2.19 (0.75 to 3.62)                 | 0.003                        |
| Year: Tainan                              | -0.35 (-1.79 to 1.09)               | 0.633                        |
| Year: Taitung County                      | 0.98 (-0.45 to 2.42)                | 0.181                        |
| Year: Taoyuan                             | -0.51 (-1.94 to 0.93)               | 0.490                        |
| Year: Yilan County                        | 2.66 (1.22 to 4.09)                 | <0.001                       |
| Year: Yunlin County                       | 1.33 (-0.10 to 2.77)                | 0.070                        |
| Year <sup>2</sup> : County                | Year <sup>2</sup> : Chiayi County   | -0.27 (-0.96 to 0.42) 0.443  |
|                                           | Year <sup>2</sup> : Chiayi City     | -0.46 (-1.15 to 0.23) 0.189  |
|                                           | Year <sup>2</sup> : Changhua County | 0.52 (-0.17 to 1.21) 0.142   |
|                                           | Year <sup>2</sup> : Hsinchu County  | 0.63 (-0.06 to 1.32) 0.075   |
|                                           | Year <sup>2</sup> : Hsinchu City    | 0.20 (-0.49 to 0.89) 0.578   |
|                                           | Year <sup>2</sup> : Hualien County  | -0.43 (-1.12 to 0.26) 0.221  |
|                                           | Year <sup>2</sup> : Kaohsiung       | -0.40 (-1.09 to 0.29) 0.256  |
|                                           | Year <sup>2</sup> : Keelung County  | -0.85 (-1.54 to -0.16) 0.015 |
| Year <sup>2</sup> : Kinmen and Lienchiang |                                     |                              |
| County                                    | 0.05 (-0.64 to 0.74)                | 0.889                        |
| Year <sup>2</sup> : Miaoli County         | 0.03 (-0.66 to 0.72)                | 0.942                        |
| Year <sup>2</sup> : Nantou County         | -0.04 (-0.73 to 0.65)               | 0.918                        |
| Year <sup>2</sup> : New Taipei            | -0.17 (-0.86 to 0.52)               | 0.626                        |
| Year <sup>2</sup> : Penghu County         | -0.90 (-1.59 to -0.21)              | 0.011                        |
| Year <sup>2</sup> : Pingtung County       | 0.92 (0.23 to 1.61)                 | 0.009                        |
| Year <sup>2</sup> : Taichung              | -0.89 (-1.58 to -0.20)              | 0.011                        |
| Year <sup>2</sup> : Tainan                | -3.53E-03 (-0.69 to 0.69)           | 0.992                        |
| Year <sup>2</sup> : Taitung County        | -0.32 (-1.01 to 0.37)               | 0.365                        |
| Year <sup>2</sup> : Taoyuan               | 0.25 (-0.44 to 0.94)                | 0.479                        |
| Year <sup>2</sup> : Yilan County          | -0.96 (-1.65 to -0.27)              | 0.007                        |
| Year <sup>2</sup> : Yunlin County         | -0.89 (-1.58 to -0.20)              | 0.011                        |

<sup>1</sup>: confidence interval

**Supplementary File 5 Table 8.** Final multivariable linear regression model for logarithmic transformation of monthly workload of shelter veterinarians from 2018 to 2020.

| <b>Covariate</b> | <b>Category</b>              | <b>Estimate (95% CI<sup>1</sup>)</b> | <b>P-value</b> |
|------------------|------------------------------|--------------------------------------|----------------|
| Intercept        |                              | 3.79 (3.56 to 4.03)                  | <0.001         |
| Year             | Year                         | -0.13 (-0.29 to 0.03)                | 0.121          |
| Month            | February                     | -0.21 (-0.35 to -0.07)               | 0.004          |
|                  | March                        | 0.10 (-0.04 to 0.24)                 | 0.175          |
|                  | April                        | 0.07 (-0.07 to 0.21)                 | 0.336          |
|                  | May                          | 0.17 (0.03 to 0.31)                  | 0.020          |
|                  | June                         | 0.10 (-0.04 to 0.24)                 | 0.173          |
|                  | July                         | 0.09 (-0.05 to 0.24)                 | 0.207          |
|                  | August                       | 0.13 (-0.01 to 0.27)                 | 0.076          |
|                  | September                    | 0.20 (0.05 to 0.34)                  | 0.008          |
|                  | October                      | 0.27 (0.13 to 0.41)                  | <0.001         |
|                  | November                     | 0.22 (0.07 to 0.36)                  | 0.003          |
|                  | December                     | 0.19 (0.05 to 0.33)                  | 0.010          |
| County           | Chiayi County                | -1.32 (-1.62 to -1.02)               | <0.001         |
|                  | Chiayi City                  | -0.08 (-0.38 to 0.22)                | 0.615          |
|                  | Changhua County              | -0.01 (-0.31 to 0.28)                | 0.922          |
|                  | Hsinchu County               | 0.87 (0.57 to 1.17)                  | <0.001         |
|                  | Hsinchu City                 | -0.16 (-0.46 to 0.14)                | 0.298          |
|                  | Hualien County               | 0.26 (-0.04 to 0.56)                 | 0.085          |
|                  | Kaohsiung                    | 0.07 (-0.23 to 0.37)                 | 0.655          |
|                  | Keelung County               | 0.11 (-0.19 to 0.41)                 | 0.476          |
|                  | Kinmen and Lienchiang County | -0.02 (-0.32 to 0.28)                | 0.882          |
|                  | Miaoli County                | 0.44 (0.14 to 0.74)                  | 0.004          |
|                  | Nantou County                | -0.75 (-1.04 to -0.45)               | <0.001         |
|                  | New Taipei                   | 0.63 (0.33 to 0.93)                  | <0.001         |
|                  | Penghu County                | 0.37 (0.07 to 0.67)                  | 0.015          |
|                  | Pingtung County              | -0.36 (-0.66 to -0.06)               | 0.018          |
|                  | Taichung                     | 0.62 (0.32 to 0.92)                  | <0.001         |
|                  | Tainan                       | 0.13 (-0.17 to 0.43)                 | 0.381          |
|                  | Taitung County               | 0.15 (-0.15 to 0.45)                 | 0.321          |
|                  | Taoyuan                      | 0.72 (0.42 to 1.02)                  | <0.001         |
|                  | Yilan County                 | 0.03 (-0.27 to 0.33)                 | 0.829          |
|                  | Yunlin County                | -1.08 (-1.38 to -0.78)               | <0.001         |

|              |                                       |                         |        |
|--------------|---------------------------------------|-------------------------|--------|
| Year: County | Year: Chiayi County                   | 0.51 (0.28 to 0.74)     | <0.001 |
|              | Year: Chiayi City                     | 0.20 (-0.03 to 0.43)    | 0.093  |
|              | Year: Changhua County                 | 0.80 (0.57 to 1.03)     | <0.001 |
|              | Year: Hsinchu County                  | 0.37 (0.14 to 0.61)     | 0.002  |
|              | Year: Hsinchu City                    | 0.21 (-0.02 to 0.44)    | 0.074  |
|              | Year: Hualien County                  | 0.68 (0.45 to 0.91)     | <0.001 |
|              | Year: Kaohsiung                       | 0.34 (0.11 to 0.57)     | 0.004  |
|              | Year: Keelung County                  | -0.04 (-0.27 to 0.19)   | 0.746  |
|              | Year: Kinmen and Lienchiang<br>County | 0.04 (-0.19 to 0.27)    | 0.735  |
|              | Year: Miaoli County                   | 0.49 (0.26 to 0.72)     | <0.001 |
|              | Year: Nantou County                   | 0.41 (0.17 to 0.64)     | <0.001 |
|              | Year: New Taipei                      | -0.20 (-0.43 to 0.04)   | 0.098  |
|              | Year: Penghu County                   | -0.26 (-0.49 to -0.03)  | 0.026  |
|              | Year: Pingtung County                 | 1.01 (0.78 to 1.24)     | <0.001 |
|              | Year: Taichung                        | 0.14 (-0.09 to 0.37)    | 0.231  |
|              | Year: Tainan                          | 0.24 (4.44E-03 to 0.47) | 0.046  |
|              | Year: Taitung County                  | -0.30 (-0.54 to -0.07)  | 0.010  |
|              | Year: Taoyuan                         | 0.21 (-0.03 to 0.44)    | 0.083  |
|              | Year: Yilan County                    | 0.33 (0.09 to 0.56)     | 0.006  |
|              | Year: Yunlin County                   | 0.13 (-0.10 to 0.36)    | 0.272  |

<sup>1</sup>: confidence interval
