# Supplementary material for: Trends in Animal Shelter Management, Adoption, and Animal Death in Taiwan from 2012 to 2020
Source: Animals (Basel). 2023 Apr 24;13(9):1451. doi: 10.3390/ani13091451 (PMC10177604; doi:10.3390/ani13091451)
Supplement: Supplementary file 1 [file animals-13-01451-s001.zip › Table S1.xlsx]

## Sheet: Sheet1
Table S1. Shelter capacity for each county in Taiwan in 2020.
	Shelter capacity for dogs	Shelter capacity for cats	Total shelter capacity
New Taipei	1615	380	1995
Taipei	450	160	610
Taichung	400	100	500
Tainan	700	60	760
Kaohsiung	900	50	950
Taoyuan	652	198	850
Yilan County	270	60	330
Hsinchu County	114	12	126
Miaoli County	220	80	300
Changhua County	239	12	251
Nantou County	300	70	370
Yunlin County	300	0	300
Chiayi County	110	0	110
Pingtung County	80	12	92
Taitung County	104	16	120
Hualien County	92	8	100
Penghu County	348	70	418
Keelung County	100	50	150
Hsinchu City	250	150	400
Chiayi City	100	20	120
Kinmen County	200	60	260
Lienchiang County	120	0	120
